# Supplementary material for: Tilorone and Cridanimod Protect Mice and Show Antiviral Activity in Rats despite Absence of the Interferon-Inducing Effect in Rats
Source: MDPI journal article supplement (doi:10.3390/ph15050617), 2022-05-17
Supplement: s1 [file s1]

**Supplementary Material**  
**to**  
**Tilorone and Cridanimod Protect Mice and Show Antiviral Activity in Rats Despite**  
**Absence of the Interferon-Inducing Effect in Rats**

Viktoriya Keyer, Laura Syzdykova, Gulzat Zauatbayeva, Aigerim Zhulikeyeva, Yerlan Ramanculov, Alexandr V. Shustov<sup>\*</sup>, Zarina Shulgau

National Center for Biotechnology, Korgalzhin hwy 13/5, Nur-Sultan 010000, Kazakhstan

**\*Correspondence:**

Alexandr V. Shustov, shustov@biocenter.kz, phone: +87029484554

|                                       |                           |
|---------------------------------------|---------------------------|
| <b>V.K.:</b> keer@biocenter.kz        | ORCID 0000-0001-8885-2387 |
| <b>L.S.:</b> syzdykova@biocenter.kz   | ORCID 0000-0002-8889-1615 |
| <b>G.Z.:</b> zauatbaeva@biocenter.kz  | ORCID 0000-0003-1514-9302 |
| <b>A.Zh.:</b> zhulikeeva@biocenter.kz | ORCID 0000-0001-6136-8093 |
| <b>Y.R.:</b> ramanculov@biocenter.kz  | ORCID 0000-0001-6786-3028 |
| <b>A.V.S.:</b> shustov@biocenter.kz   | ORCID 0000-0001-9880-9382 |
| <b>Z.Sh.:</b> shulgau@biocenter.kz    | ORCID 0000-0001-8148-0816 |

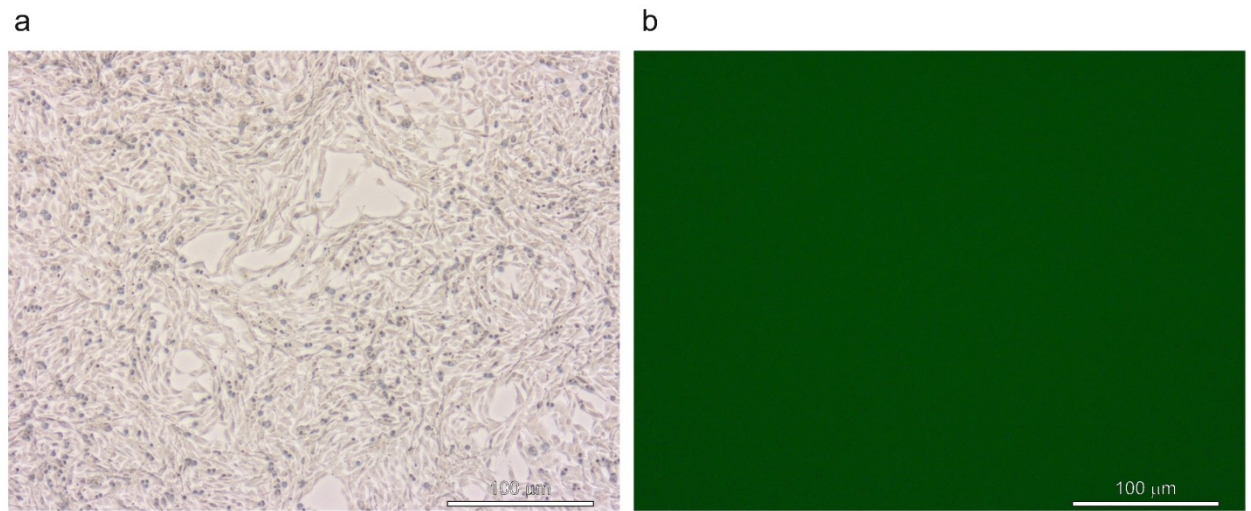

**Figure S1.** Control uninfected BHK-21 cells. **(a)** Image in white light. **(b)** Image in blue light to excite GFP. The same field as in panel **(a)**. Magnification 50X.

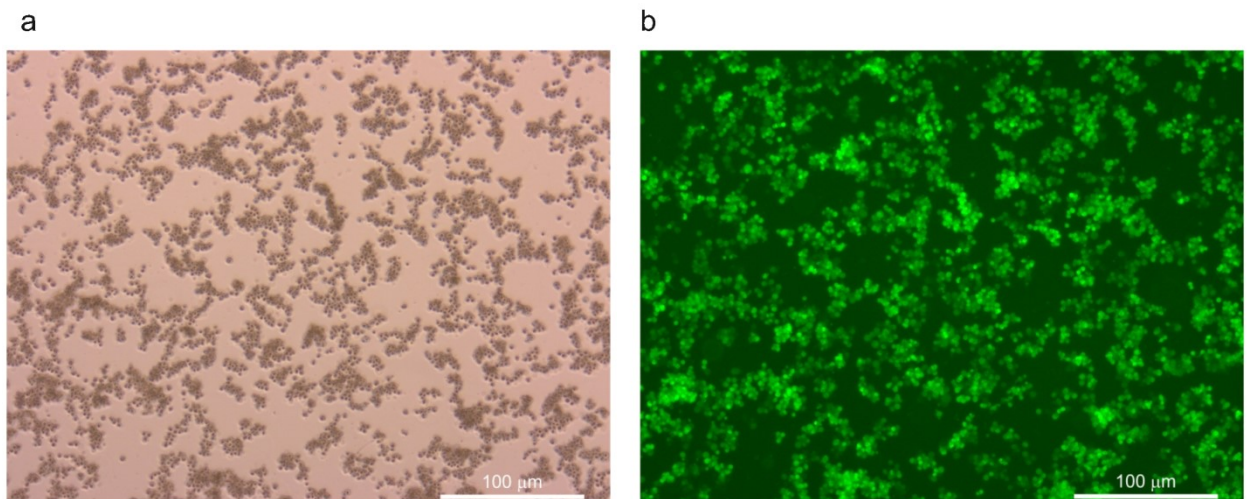

**Figure S2.** Pictures of the BHK-21 cell culture at 72 hours after transfection with a molecular infectious clone to rescue the cTC-83/TrD-GFP virus. **(a)** Image in white light. Cytopathic effect (CPE) is clearly visible. **(b)** GFP fluorescence in the same culture shown in panel **(a)**, the same microscopic field is shown in blue light. Magnification 50X.

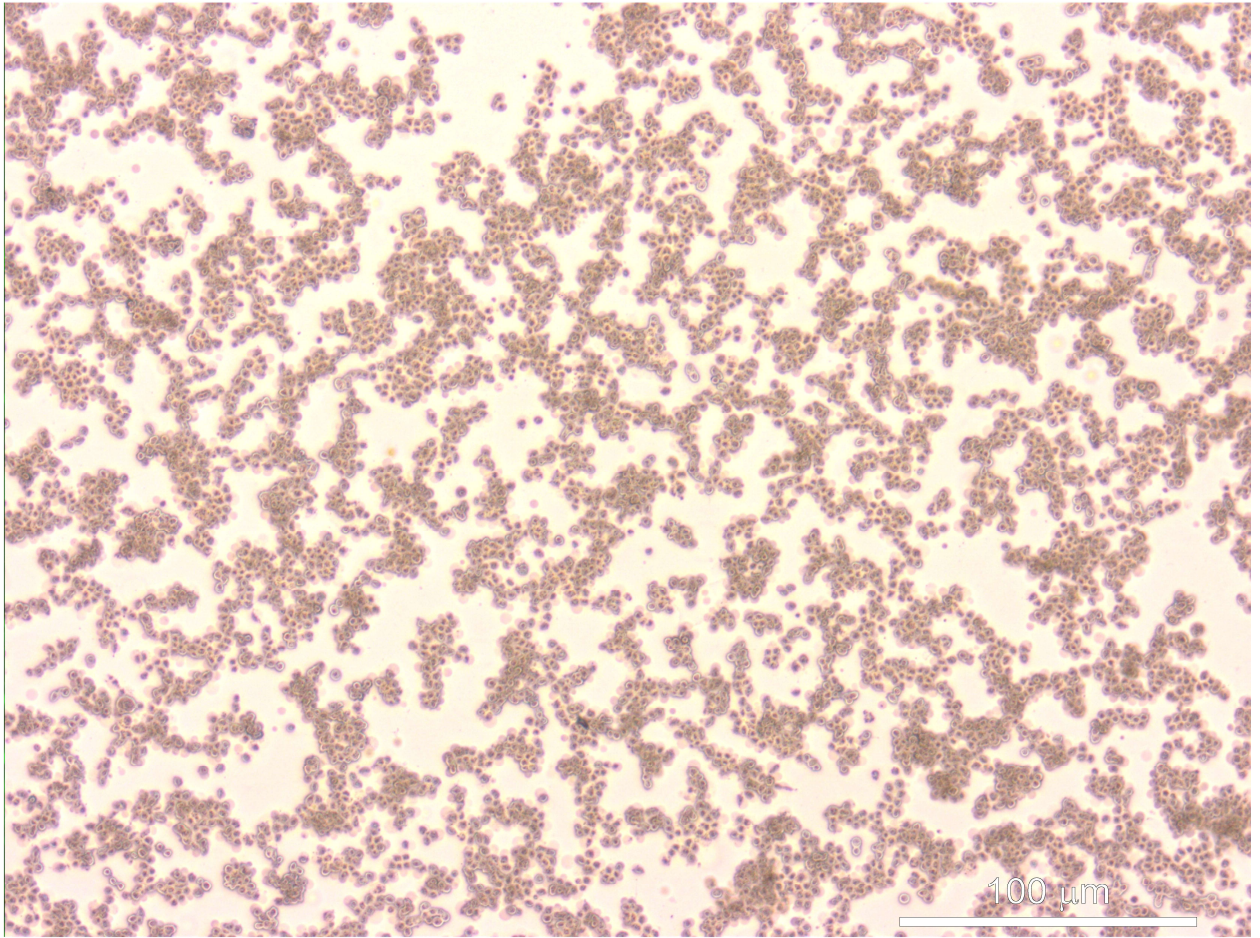

**Figure S3.** Cytopathic effect (CPE) in BHK-21 cells infected with the cTC-83 virus. Image in white light was taken on day 3 after transfection with a molecular infectious clone to rescue the cTC-83 virus. Magnification 50X.



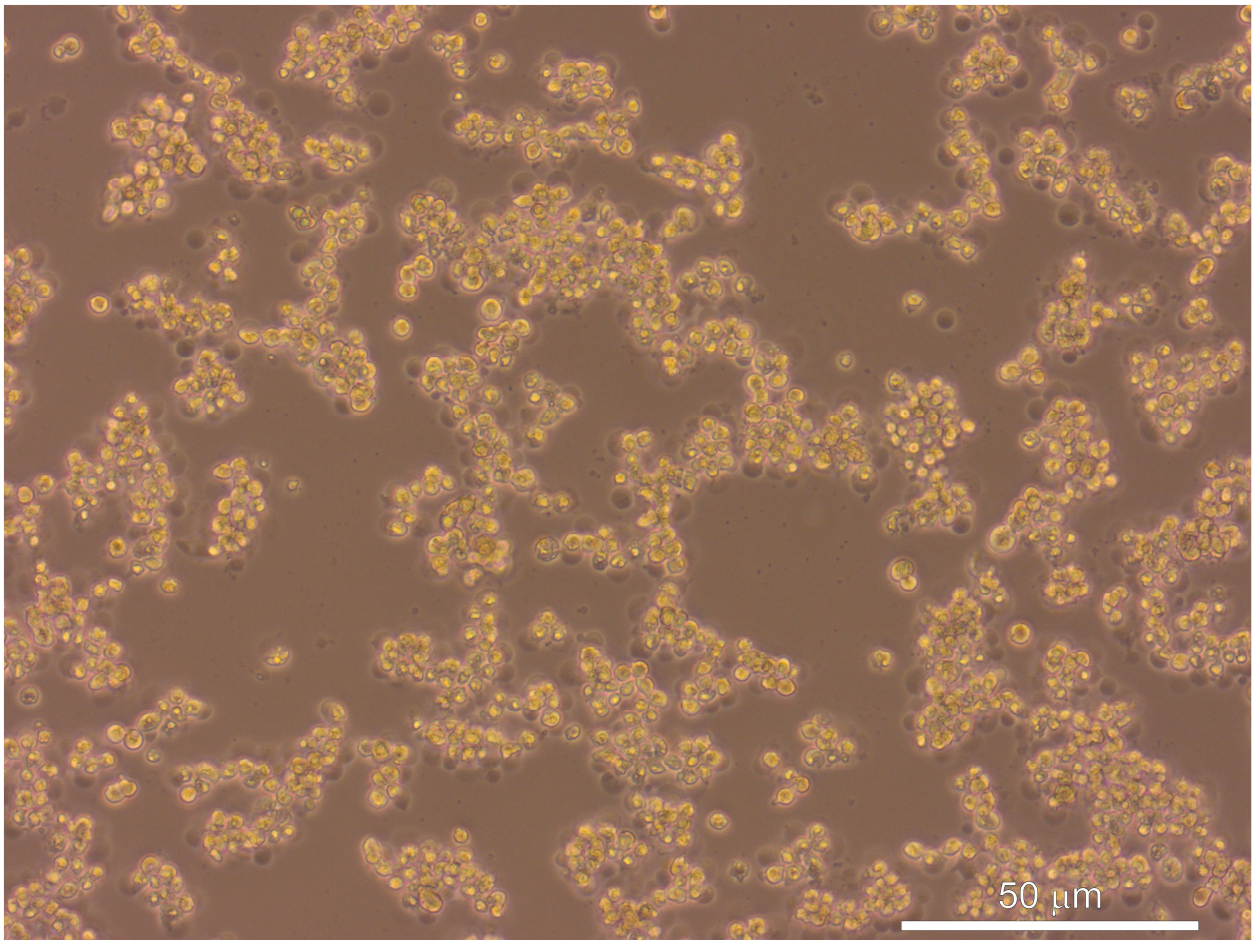

**Figure S4.** Cytopathic effect (CPE) in BHK-21 cells infected with the cTC-83/TrD virus. Image in white light was taken on day 3 after transfection with a molecular infectious clone to rescue the cTC-83/TrD virus. Magnification 100X.

**Figure S5.** Nucleotide sequence of the cTC-83 molecular infectious clone

LOCUS cTC-83 16682 bp DNA circular 10-JAN-2022

SOURCE

ORGANISM

FEATURES Location/Qualifiers

rep\_origin 14366..14911  
/vntifkey="33"  
/label=p15A\origin\of replication  
CDS complement(15076..15936)  
/vntifkey="4"  
/label=Ap  
polyA\_signal 11965..12550  
/vntifkey="25"  
/label=PolyA\signal\from\HGH\human\growth\hormone)  
misc\_feature 12635..12937  
/vntifkey="21"  
/label=SV40\ori  
promoter 16111..16682  
/vntifkey="29"  
/label=CMV\promoter  
misc\_RNA 11473..11556  
/vntifkey="53"  
/label=Antigenomic\RBZ\HDV  
misc\_feature 11965..4  
/vntifkey="21"  
/label=plasmid\vector  
CDS 8564..9832  
/vntifkey="4"  
/label=E2  
CDS 9833..10000  
/product="6K protein"  
/vntifkey="4"  
/label=6k  
/note="putative"  
CDS 8387..8563  
/product="E3"  
/function="incorporated into the envelope of some alpha  
viruses"  
/vntifkey="4"  
/label=E3  
/note="putative"  
CDS 5703..7523  
/product="nsP4"  
/function="replication"  
/vntifkey="4"  
/label=nsP4  
/note="putative"  
CDS 4032..5702  
/product="nsP3"  
/function="replication"  
/vntifkey="4"

```

        /label=nsP3
        /note="putative"
CDS      1650..4031
        /product="nsP2"
        /function="replication"
        /vntifkey="4"
        /label=nsP2
        /note="putative"
CDS      45..1649
        /product="nsP1"
        /vntifkey="4"
        /label=nsP1
        /note="putative"
5'UTR    1..44
        /vntifkey="52"
        /label=5'UTR
promoter  7501..7545
        /vntifkey="29"
        /label=Subgenomic\promoter\ (SP)
CDS      7562..8386
        /vntifkey="4"
        /label=C
CDS      10001..11326
        /vntifkey="4"
        /label=E1
CDS      13015..13806
        /vntifkey="4"
        /label=Neo
BASE COUNT  4481 a   4163 c   4211 g   3827 t
ORIGIN
      1 ataggcggcg catgagagaa gccagacca attacctacc caaaatggag
aaagttcacg
     61 ttgacatcga ggaagacagc ccattcctca gagctttgca gcggagcttc
ccgcagtttg
    121 aggtagaagc caagcaggtc actgataatg accatgctaa tgccagagcg
ttttcgcatc
    181 tggcttcaaa actgatcgaa acggagggtg acccatccga cacgatcctt
gacattggaa
    241 gtgcgcccgc ccgcagaatg tattctaagc acaagtatca ttgtatctgt
ccgatgagat
    301 gtgcggaaga tccggacaga ttgtataagt atgcaactaa gctgaagaaa
aactgtaagg
    361 aaataactga taaggaattg gacaagaaaa tgaaggagct cgccgccgtc
atgagcgacc
    421 ctgacctgga aactgagact atgtgcctcc acgacgacga gtcgtgtcgc
tacgaagggc
    481 aagtcgctgt ttaccaggat gtatacgcgg ttgacggacc gacaagtctc
tatcaccaag
    541 ccaataaggg agttagagtc gcctactgga taggctttga caccaccctt
tttatgttta
    601 agaacttggc tggagcatat ccatacact ctaccaactg ggccgacgaa
accgtgttaa

```

661 cggctcgtaa cataggccta tgcagctctg acgttatgga gcggtcacgt  
 agagggatgt  
 721 ccattcttag aaagaagtat ttgaaacat ccaacaatgt tctattctct  
 gttggctcga  
 781 ccattctacca cgagaagagg gacttactga ggagctggca cctgccgtct  
 gtatttcact  
 841 tacgtggcaa gcaaaattac acatgtcggg gtgagactat agttagttgc  
 gacgggtacg  
 901 tcgttaaaag aatagctatc agtccaggcc tgtatgggaa gccttcaggc  
 tatgctgcta  
 961 cgatgcaccg cgagggattc ttgtgctgca aagtgcaga cacattgaac  
 ggggagaggg  
 1021 tctcttttcc cgtgtgcacg tatgtgccag ctacattgtg tgaccaaagt  
 actggcatac  
 1081 tggcaacaga tgtcagtgcg gacgacgcgc aaaaactgct ggttgggctc  
 aaccagcgta  
 1141 tagtcgtcaa cggtcgcacc cagagaaaca ccaataccat gaaaaattac  
 cttttgcccg  
 1201 tagtggccca ggcatttgct aggtgggcaa aggaatataa ggaagatcaa  
 gaagatgaaa  
 1261 ggccactagg actacgagat agacagttag tcatgggggtg ttgttgggct  
 tttagaaggc  
 1321 acaagataac atctatttat aagcgcccgg atacccaaac catcatcaaa  
 gtgaacagcg  
 1381 atttccactc attcgtgctg cccaggatag gcagtaacac attggagatc  
 gggctgagaa  
 1441 caagaatcag gaaaatgtta gaggagcaca aggagccgtc acctctcatt  
 accgccgagg  
 1501 acgtacaaga agctaagtgc gcagccgatg aggctaagga ggtgcgtgaa  
 gccgaggagt  
 1561 tgcgcgcagc tctaccacct ttggcagctg atgttgagga gccactctg  
 gaagccgatg  
 1621 tcgacttgat gttacaagag gctggggccg gctcagtgga gacacctcgt  
 ggcttgataa  
 1681 aggttaccag ctacgatggc gaggacaaga tcggctctta cgctgtgctt  
 tctccgcagg  
 1741 ctgtactcaa gagtgaaaaa ttatcttgca tccaccctct cgctgaacaa  
 gtcatagtga  
 1801 taacacactc tggccgaaaa gggcgttatg ccgtggaacc ataccatggg  
 aaagtagtgg  
 1861 tgccagaggg acatgcaata cccgtccagg actttcaagc tctgagtga  
 agtgccacca  
 1921 ttgtgtacaa cgaacgtgag ttcgtaaaca ggtacctgca ccatattgcc  
 acacatggag  
 1981 gagcgctgaa cactgatgaa gaatattaca aaactgtcaa gccagcgag  
 cagcagcg  
 2041 aataacctgta cgacatcgac aggaacacgt gcgtcaagaa agaactagtc  
 actgggctag  
 2101 ggctcacagg cgagctgggt gatcctccct tccatgaatt cgccacgag  
 agtctgagaa  
 2161 cagcaccagc cgctccttac caagtaccaa ccataggggt gtatggcggt  
 ccaggatcag

2221 gcaagtctgg catcattaaa agcgcagtca ccaaaaaaga tctagtgggtg  
 agcgccaaga  
 2281 aagaaaactg tgcagaaatt ataagggacg tcaagaaaat gaaagggctg  
 gacgtcaatg  
 2341 ccagaactgt ggactcagtg ctcttgaatg gatgcaaaca ccccgtagag  
 accctgtata  
 2401 ttgacgaagc ttttgcttgt catgcaggta ctctcagagc gctcatagcc  
 attataagac  
 2461 ctaaaaaggc agtgctctgc ggggatccca aacagtgcgg tttttttaac  
 atgatgtgcc  
 2521 tgaaagtgca ttttaaccac gagatttgca cacaagtctt ccacaaaagc  
 atctctcgcc  
 2581 gttgcactaa atctgtgact tcggtcgtct caaccttggt ttacgacaaa  
 aaaatgagaa  
 2641 cgacgaatcc gaaagagact aagattgtga ttgacactac cggcagtacc  
 aaacctaagc  
 2701 aggacgatct cattctcact tgtttcagag ggtgggtgaa gcagttgcaa  
 atagattaca  
 2761 aaggcaacga aataatgacg gcagctgcct ctcaagggct gacccgtaaa  
 ggtgtgtatg  
 2821 ccgttcggta caaggtgaat gaaaatcctc tgtacgcacc cacctcagaa  
 catgtgaacg  
 2881 tcctactgac ccgcacggag gaccgcatcg tgtggaaaac actagccggc  
 gacccatgga  
 2941 taaaaacact gactgccaag taccctggga atttactgc cacgatagag  
 gagtggcaag  
 3001 cagagcatga tgccatcatg aggcacatct tggagagacc ggaccctacc  
 gacgtcttcc  
 3061 agaataaggc aaacgtgtgt tgggccaagg ctttagtgcc ggtgctgaag  
 accgctggca  
 3121 tagacatgac cactgaacaa tggaacactg tggattatth tgaaacggac  
 aaagctcact  
 3181 cagcagagat agtattgaac caactatgag tgaggttctt tggactcgat  
 ctggactccg  
 3241 gtctatthtc tgcaccact gttccgttat ccattaggaa taatcactgg  
 gataactccc  
 3301 cgtcgcttaa catgtacggg ctgaataaag aagtggctccg tcagctctct  
 cgcaggtacc  
 3361 cacaactgcc tcgggcagtt gccactggaa gagtctatga catgaacact  
 ggtacactgc  
 3421 gcaattatga tccgcgcata aacctagtag ctgtaaacag aagactgcct  
 catgctttag  
 3481 tcctccacca taatgaacac ccacagagtg actthtcttc attcgtcagc  
 aaattgaagg  
 3541 gcagaactgt cctggtgggc ggggaaaagt tgtccgtccc aggcaaatg  
 gttgactggt  
 3601 tgtcagaccg gcctgaggct acctcagag ctcggtgga tttaggcatc  
 ccaggtgatg  
 3661 tgcccaaata tgacataata tttgttaatg tgaggacccc atataaatac  
 catcactatc  
 3721 agcagtgtga agaccatgcc attaagctta gcatgttgac caagaaagct  
 tgtctgcac



3781 tgaatcccgg cggaacctgt gtcagcatag gttatggtta cgctgacagg  
 gccagcga  
 3841 gcatcattgg tgctatagcg cggcagttca agttttcccg ggtatgcaaa  
 ccgaaatcct  
 3901 cacttgaaga gacggaagtt ctgtttgtat tcattgggta cgatcgcaag  
 gcccgtagcg  
 3961 acaatcctta caagctttca tcaaccttga ccaacattta tacaggttcc  
 agactccacg  
 4021 aagccggatg tgcaccctca tatcatgtgg tgcgagggga tattgccacg  
 gccaccgaag  
 4081 gagtgattat aaatgctgct aacagcaaag gacaacctgg cggagggggtg  
 tgcggagcgc  
 4141 tgtataagaa attcccggaa agcttcgatt tacagccgat cgaagtagga  
 aaagcgcgac  
 4201 tgggtcaaagg tgcagctaaa catatcattc atgccgtagg accaaacttc  
 aacaaagt  
 4261 cggaggttga aggtgacaaa cagttggcag aggcttatga gtccatcgct  
 aagattgtca  
 4321 acgataacaa ttacaagtca gtagcgattc cactgttgtc caccggcatc  
 tttccggga  
 4381 acaaagatcg actaaccxaa tcattgaacc atttgctgac agctttagac  
 accactgatg  
 4441 cagatgtagc catatactgc agggacaaga aatgggaaat gactctcaag  
 gaagcagtgg  
 4501 ctaggagaga agcagtggag gagatatgca tatccgacga ctcttcagtg  
 acagaacctg  
 4561 atgcagagct ggtgaggggtg catccgaaga gttctttggc tgggaaggaa  
 ggctacagca  
 4621 caagcgatgg caaaactttc tcatatttgg aagggaccaa gtttcaccag  
 gcggccaagg  
 4681 atatagcaga aattaatgcc atgtggcccg ttgcaacgga ggccaatgag  
 caggtatgca  
 4741 tgtatatcct cggagaaagc atgagcagta ttaggtcgaa atgccccgtc  
 gaagagtcgg  
 4801 aagcctccac accacctagc acgctgcctt gcttgtgcat ccatgccatg  
 actccagaaa  
 4861 gagtacagcg cctaaaagcc tcacgtccag acaaattac tgtgtgctca  
 tcctttccat  
 4921 tgccgaagta tagaatcact ggtgtgcaga agatccaatg ctcccagcct  
 atattgttct  
 4981 caccgaaagt gcctgcgtat attcatcaa ggaagtatct cgtggaaaca  
 ccaccgtag  
 5041 acgagactcc ggagccatcg gcagagaacc aatccacaga ggggacacct  
 gaacaaccac  
 5101 cacttataac cgaggatgag accaggacta gaacgcctga gccgatcatc  
 atcgaagagg  
 5161 aagaagagga tagcataagt ttgctgtcag atggcccgcac ccaccagggtg  
 ctgcaagtcg  
 5221 aggcagacat tcacggggccg ccctctgtat ctagctcatc ctgggtccatt  
 cctcatgcat  
 5281 ccgactttga tgtggacagt ttatccatac ttgacaccct ggagggagct  
 agcgtgacca

5341 gcgggggcaac gtcagccgag actaactctt acttcgcaaa gagtatggag  
 tttctggcgc  
 5401 gaccggtgcc tgcgccctga acagtattca ggaaccctcc acatcccgct  
 ccgcgcacaa  
 5461 gaacaccgtc acttgcaccc agcagggcct gctcgagaac cagcctagtt  
 tccaccccgc  
 5521 caggcgtgaa taggggtgatc actagagagg agctcgaggc gcttaccgcc  
 tcacgcactc  
 5581 ctagcaggtc ggtctcgaga accagcctgg tctccaaccc gccaggcgta  
 aataggggtga  
 5641 ttacaagaga ggagtttgag gcgttcgtag cacaacaaca atgacgggtt  
 gatgcgggtg  
 5701 catacatctt ttcctccgac accgggtcaag ggcatttaca acaaaaatca  
 gtaaggcaaa  
 5761 cggtgctatc cgaagtgggtg ttggagagga ccgaattgga gatttcgtat  
 gccccgcgcc  
 5821 tcgaccaaga aaaagaagaa ttactacgca agaaattaca gttaaatccc  
 acacctgcta  
 5881 acagaagcag ataccagtcc aggaagggtgg agaacatgaa agccataaca  
 gctagacgta  
 5941 ttctgcaagg cctagggcat tatttgaagg cagaaggaaa agtggagtgc  
 taccgaaccc  
 6001 tgcattcctgt tcctttgtat tcatctagtg tgaaccgtgc cttttcaagc  
 cccaagggtcg  
 6061 cagtgggaagc ctgtaacgcc atgttgaaag agaactttcc gactgtggct  
 tcttactgta  
 6121 ttattccaga gtacgatgcc tatttggaca tgggtgacgg agcttcatgc  
 tgcttagaca  
 6181 ctgccagttt ttgccctgca aagctgcgca gctttccaaa gaaacactcc  
 tatttgaac  
 6241 ccacaatacg atcggcagtg ccttcagcga tccagaacac gctccagaac  
 gtcttggcag  
 6301 ctgccacaaa aagaaattgc aatgtcacgc aaatgagaga attgcccgta  
 ttggattcgg  
 6361 cggcctttta tgtggaatgc ttcaagaaat atgcgtgtaa taatgaatat  
 tgggaaacgt  
 6421 ttaaagaaaa ccccatcagg cttactgaag aaaacgtgggt aaattacatt  
 accaaattaa  
 6481 aaggaccaa agctgctgct ctttttgca agacacataa tttgaatatg  
 ttgcaggaca  
 6541 taccaatgga caggtttgta atggacttaa agagagacgt gaaagtgact  
 ccaggaacaa  
 6601 aacatactga agaacggccc aaggtacagg tgatccaggc tgccgatccg  
 ctagcaacag  
 6661 cgtatctgtg cggaatccac cgagagctgg ttaggagatt aaatgcggtc  
 ctgcttccga  
 6721 acattcatac actgtttgat atgtcggctg aagactttga cgctattata  
 gccgagcact  
 6781 tccagcctgg ggattgtggt ctggaaactg acatcgcgtc gtttgataaa  
 agtgaggacg  
 6841 acgccatggc tctgaccgcg ttaatgattc tggaagactt aggtgtggac  
 gcagagctgt

6901 tgacgctgat tgaggcggct ttcggcgaaa tttcatcaat acatttgccc  
 actaaaacta  
 6961 aattttaaatt cggagccatg atgaaatctg gaatgttcct cacactgttt  
 gtgaacacag  
 7021 tcattaacat tgtaatcgca agcagagtgt tgagagaacg gctaaccgga  
 tcaccatgtg  
 7081 cagcattcat tggagatgac aatatcgtga aaggagtcaa atcggacaaa  
 ttaatggcag  
 7141 acaggtgcg cacctgggtg aatatggaag tcaagattat agatgctgtg  
 gtgggcgaga  
 7201 aagcgcctta tttctgtgga gggtttattt tgtgtgactc cgtgaccggc  
 acagcgtgcc  
 7261 gtgtggcaga cccctaataa aggctgttta agcttggaac acctctggca  
 gcagacgatg  
 7321 aacatgatga tgacaggaga agggcattgc atgaagagtc aacacgctgg  
 aaccgagtgg  
 7381 gtattctttc agagctgtgc aaggcagtag aatcaaggta tgaaaccgta  
 ggaacttcca  
 7441 tcatagttat ggccatgact actctagcta gcagtgttaa atcattcagc  
 tacttgagag  
 7501 gggcccctat aactctctac ggctaacctg aatggactac gacatagtct  
 agtccgcaa  
 7561 gatgttcccg ttccagccaa tgtatccgat gcagccaatg ccctatcgca  
 acccgttcgc  
 7621 ggccccgcgc aggccttggg tccccagAAC cgaccctttt ctggcgatgc  
 aggtgcagga  
 7681 attaaaccgc tcgatggcta acctgacgtt caagcaacgc cgggacgcgc  
 cacctgaggg  
 7741 gccatccgct aagaaaccga agaaggaggc ctcgcaaaaa cagaaagggg  
 gaggccaaagg  
 7801 gaagaagaag aagaaccaag ggaagaagaa ggctaagaca gggccgccta  
 atccgaaggc  
 7861 acagaatgga aacaagaaga agaccaacaa gaaaccaggc aagagacagc  
 gcatggtcat  
 7921 gaaattggaa tctgacaaga cgttcccaat catgttggaa ggggaagataa  
 acggctacgc  
 7981 ttgtgtggtc ggagggaagt tattcaggcc gatgcatgtg gaaggcaaga  
 tcgacaacga  
 8041 cgttctggcc gcgcttaaga cgaagaaagc atccaaatac gatcttgagt  
 atgcagatgt  
 8101 gccacagaac atgcggggccg atacattcaa atacacccat gagaaacccc  
 aaggctatta  
 8161 cagctggcat catggagcag tccaatatga aaatgggctt ttcacgggtgc  
 cgaaaggagt  
 8221 tggggccaag ggagacagcg gacgacccat tctggataac cagggacggg  
 tggtcgctat  
 8281 tgtgctggga ggtgtgaatg aaggatctag gacagccctt tcagtcgtca  
 tgtggaacga  
 8341 gaaggaggtt accgtgaagt atactccgga gaactgagag caatgggtcac  
 tagtgaccac  
 8401 catgtgtctg ctgcgaatg tgacgttccc atgtgctcaa ccaccaattt  
 gctacgacag

8461 aaaaccagca gagactttgg ccatgctcag cgtaaactgt gacaacccgg  
 gctacgatga  
 8521 gctgctggaa gcagctgtta agtgccccgg aaggaaaagg agatccaccg  
 aggagctgtt  
 8581 taatgagtat aagctaacgc gcccttacat ggccagatgc atcagatgtg  
 cagttgggag  
 8641 ctgccatagt ccaatagcaa tcgaggcagt aaagagcgc gggcacgcgc  
 gttatgttag  
 8701 acttcagact tcctcgcagt atggcctgga ttctccggc aacttaaagg  
 gcaggaccat  
 8761 gcggtatgac atgcacggga ccattaaaga gataccacta catcaagtgt  
 cactctatac  
 8821 atctcgcccg tgtcacattg tggatgggca cggttatttc ctgcttgcca  
 ggtgccccgg  
 8881 aggggactcc atcaccatgg aatttaagaa agattccgtc agacactcct  
 gctcgggtgcc  
 8941 gtatgaagtg aaatttaatc ctgtaggcag agaactctat actcatcccc  
 cagaacacgg  
 9001 agtagagcaa gcgtgccaa tctacgcaca tgatgcacag aacagaggag  
 cttatgtcga  
 9061 gatgcacctc ccgggctcag aagtggacag cagtttggtt tccttgagcg  
 gcagttcagt  
 9121 caccgtgaca cctcctgatg ggactagcgc cctgggtggaa tgcgagtgtg  
 gcggcacaaa  
 9181 gatctccgag accatcaaca agacaaaaca gttcagccag tgcacaaaga  
 aggagcagtg  
 9241 cagagcatat cggctgcaga acgataagtg ggtgtataat tctgacaaac  
 tgcccaaagc  
 9301 agcgggagcc accttaaaag gaaaactgca tgtcccatc ttgctggcag  
 acggcaaagt  
 9361 caccgtgcct ctagcaccag aacctatgat aaccttcggt ttcagatcag  
 tgtcactgaa  
 9421 actgcaccct aagaatccca catatctaata caccgcca cttgctgatg  
 agcctcacta  
 9481 cacgcacgag ctcatatctg aaccagctgt taggaatttt accgtcaccg  
 aaaaagggtg  
 9541 ggagtttgta tggggaaacc acccgccgaa aaggttttgg gcacaggaaa  
 cagcacccgg  
 9601 aaatccacat gggctaccgc acgaggtgat aactcattat taccacagat  
 accctatgtc  
 9661 caccatcctg ggtttgtcaa tttgtgccgc cattgcaacc gtttccgttg  
 cagcgtctac  
 9721 ctggctgttt tgcagatcta gagttgcgtg cctaactcct taccggctaa  
 cacctaacgc  
 9781 taggatacca ttttgtctgg ctgtgctttg ctgcgccccg actgccccgg  
 ccgagaccac  
 9841 ctgggagtcc ttggatcacc tatggaacaa taaccaacag atgttctgga  
 ttcaattgct  
 9901 gatccctctg gccgccttga tcgtagtgac tcgcctgctc aggtgcgtgt  
 gctgtgtcgt  
 9961 gcctttttta gtcatggccg gcgcccgcag cgccggcgcc tacgagcacg  
 cgaccacgat

10021 gccgagccaa gcggaatct cgtataacac tatagtcaac agagcaggct  
 acgcaccact  
 10081 ccctatcagc ataacaccaa caaagatcaa gctgatacct acagtgaact  
 tggagtacgt  
 10141 cacctgccac tacaaaacag gaatggattc accagccatc aaatgctgcg  
 gatctcagga  
 10201 atgcactcca acttacaggc ctgatgaaca gtgcaaagtc ttcacagggg  
 tttacccggt  
 10261 catgtggggg ggtgcatatt gcttttgcg cactgagaac acccaagtca  
 gcaaggccta  
 10321 cgtaatgaaa tctgacgact gccttgcgga tcatgctgaa gcatataaag  
 cgcacacagc  
 10381 ctacgtgcag gcgttcctca acatcacagt gggagaacac tctattgtga  
 ctaccgtgta  
 10441 tgtgaatgga gaaactcctg tgaatttcaa tgggggtcaaa ataactgcag  
 gtccgctttc  
 10501 cacagcttgg acaccctttg atcgcaaaat cgtgcagtat gccggggaga  
 tctataatta  
 10561 tgattttctc gagtatgggg caggacaacc aggagcattt ggagatatac  
 aatccagaac  
 10621 agtctcaagc tctgatctgt atgccaatac caacctagtg ctgcagagac  
 ccaaagcagg  
 10681 agcgatccac gtgccataca ctcaggcacc ttcggggtttt gagcaatgga  
 agaaagataa  
 10741 agctccatca ttgaaattta ccgccccttt cggatgcgaa atatatacaa  
 accccattcg  
 10801 cgccgaaaac tgtgctgtag ggtcaattcc attagccttt gacattcccc  
 acgccttggt  
 10861 caccagggtg tcagaaacac cgacactttc agcggccgaa tgcactctta  
 acgagtgcgt  
 10921 gtattcttcc gactttgggt ggatcgccac ggtcaagtac tcggccagca  
 agtcaggcaa  
 10981 gtgcgcagtc catgtgccat cagggactgc taccctaaaa gaagcagcag  
 tcgagctaac  
 11041 cgagcaaggg tcggcgacta tccattttct gaccgcaa atccaccggt  
 agttcaggct  
 11101 ccaaatatgc acatcatatg ttacgtgcaa aggtgattgt cccccccga  
 aagaccatat  
 11161 tgtgacacac cctcagtatc acgccccaac atttacagcc gcggtgtcaa  
 aaaccgcgtg  
 11221 gacgtgggta acatccctgc tgggaggatc agccgtaatt attataattg  
 gcttggtgct  
 11281 ggctactatt gtggccatgt acgtgctgac caaccagaaa cataattgaa  
 tacagcagca  
 11341 attggcaagc tgcttacata gaactcgcg cgattggcat gccgccttaa  
 aatttttatt  
 11401 ttatttttct tttcttttcc gaatcggatt ttgtttttaa tatttcaaaa  
 aaaaaaaaaa  
 11461 aaaaaaaaaa aagggtcggc atggcatctc cacctcctcg cgggtccgacc  
 tgggcatccg  
 11521 aaggaggacg cacgtccact cggatggcta agggagagcc acgagctcct  
 cgacagatca



11581 taatcagcca taccacattht gtagaggtht tacttgcttht aaaaaacctc  
 ccacacctcc  
 11641 ccctgaacct gaaacataaa atgaatgcaa ttgtttgttgt taacttgtht  
 attgcagctt  
 11701 ataatggtta caaataaagc aatagcatca caaatthcac aaataaagca  
 tttttthcac  
 11761 tgcattctag ttgtggtht tccaaactca tcaagatacg cgtacgcggc  
 cccatgttcg  
 11821 ctttccgccg cgtggaggag gatcacagca acaccgagct gggcatcgtg  
 gagtaccagc  
 11881 acgccttcaa gaccccgcat gcagatgccg gtgaagaaag agthttaaacg  
 gccggccgcg  
 11941 gtcatagctg tttcctgaac agatcccggt tggcatccct gtgacctctc  
 cccagtgcct  
 12001 ctcttgccc tggaagtht cactccagt cccaccagcc ttgtctaat  
 aaaattaagt  
 12061 tgcattctt tgtctgacta ggtgtctctc tataatatta tgggggtggag  
 ggggggtgta  
 12121 tggagcaagg ggcaagtht gaagacaacc tgtagggcct gcgggggtcta  
 ttgggaacca  
 12181 agctggagtg cagtggcaca atcttggtc actgcaatct ccgcctctg  
 ggttcaagcg  
 12241 attctctgc ctccagctcc cgagthtgtg ggattccagg catgcatgac  
 caggctcagc  
 12301 taatthttgt tttthtggt gagacgggtt ttcaccatat tggccaggct  
 ggtctccaac  
 12361 tctaatctc aggtgatcta cccaccttg cctcccaaata tgctgggatt  
 acaggcgtga  
 12421 accactgctc ctttccctgt cttctgatt ttaaaataac tataccagca  
 ggaggacgtc  
 12481 cagacacagc ataggctacc tggccatgcc caaccggtgg gacatttgag  
 ttgcttgctt  
 12541 ggcactgtcc tctcatgcgt tgggtccact cagtagatgc ctgthgaatt  
 gggtagcggg  
 12601 ccagcttggc tgtggaatgt gtgtcagtha ggggtgtggaa agtccccagg  
 ctccccagca  
 12661 ggcagaagta tgcaaagcat gcattctaat tagtcagcaa ccagggtgtgg  
 aaagtcccca  
 12721 ggctccccag caggcagaag tatgcaaagc atgcatctca attagtcagc  
 aaccatagtc  
 12781 ccgcccctaa ctccgcccata cccgccccta actccgccc gttccgccc  
 ttctccgccc  
 12841 catggctgac taatthttth tathtatgca gaggccgagg ccgcctcggc  
 ctctgagcta  
 12901 ttccagaagt agtgaggagg cththttgga ggcctaggct tthgcaaaaa  
 gctcccgga  
 12961 gcttgatat ccatthtcgg atctgatcaa gagacaggat gaggatcgtt  
 tcgcatgatt  
 13021 gaacaagatg gattgcacgc aggttctccg gccgcttggg tggagaggct  
 attcggtat  
 13081 gactgggcac aacagacaat cggctgctct gatgccgccg tgttccggct  
 gtcagcgag

13141 gggcgcccgg ttctttttgt caagaccgac ctgtccggtg ccctgaatga  
 actgcaggac  
 13201 gaggcagcgc ggctatcgtg gctggccacg acgggcgttc cttgcgcagc  
 tgtgctcgac  
 13261 gttgtcactg aagcggaag ggactggctg ctattgggcg aagtgccggg  
 gcaggatctc  
 13321 ctgtcatctc accttgetcc tgccgagaaa gtatccatca tggctgatgc  
 aatgcggcgg  
 13381 ctgcatacgc ttgatccggc tacctgcca ttcgaccacc aagcgaaaca  
 tcgcatcgag  
 13441 cgagcacgta ctcgatgga agccgggtctt gtcgatcagg atgatctgga  
 cgaagagcat  
 13501 caggggctcg cgccagccga actgttcgcc aggctcaagg cgcgcatgcc  
 cgacggcggg  
 13561 gatctcgtcg tgacccatgg cgatgcctgc ttgccgaata tcatggtgga  
 aatggccgc  
 13621 ttttctggat tcatcgactg tggccggctg ggtgtggccg accgctatca  
 ggacatagcg  
 13681 ttggctacc gtgatattgc tgaagagctt ggccggcaat gggctgaccg  
 ctctctcgtg  
 13741 ctttacggta tcgccgtcc cgattcgcag cgcatgcct tctatgcct  
 tcttgacgag  
 13801 ttcttctgag cgggactctg gggttcgaaa tgaccgacca agcgacgccc  
 aacctgccat  
 13861 cacgagattt cgattccacc gccgccttct atgaaagggtt gggcttcgga  
 atcgttttcc  
 13921 gggacgccgg ctggatgatc ctccagcgcg gggatctcat gctggagttc  
 ttcgcccacc  
 13981 ccaacttggt tattgcagct tataatggtt acaaataaag caatagcatc  
 acaaatttca  
 14041 caaataaagc atttttttca ctgcattcta gttgtggttt gtccaaactc  
 atcaatgtat  
 14101 cttatcatgt ctgtatactg gcttactatg ttggcactga tgagggtgtc  
 agtgaagtgc  
 14161 ttcattgtggc aggagaaaaa aggctgcacc ggtgcgtcag cagaatatgt  
 gatacaggat  
 14221 atattccgct tcctcgtca ctgactcgtc acgctcggtc gttcgactgc  
 ggcgagcggg  
 14281 aatggcttac gaacggggcg gagatttcct ggaagatgcc aggaagatac  
 ttaacaggga  
 14341 agtgagaggg ccgcggcaaa gccgtttttc cataggctcc gccccctga  
 caagcatcac  
 14401 gaaatctgac gctcaaata gtggtggcga aaccgcacag gactataaag  
 ataccaggcg  
 14461 tttcccctgg cggctccctc gtgcgtctc ctgttcctgc ctttcggttt  
 accggtgtca  
 14521 ttccgctggt atggccgcgt ttgtctcatt ccacgcctga cactcagttc  
 cgggtaggca  
 14581 gttecgctcca agctggactg tatgcacgaa cccccgttc agtccgaccg  
 ctgcgcctta  
 14641 tccggtaact atcgtcttga gtccaaccg gaaagacatg caaaagcacc  
 actggcagca

14701 gccactggta attgatttag aggagttagt cttgaagtca tgcgccggtt  
 aaggctaaac  
 14761 tgaaaggaca agtttttggtg actgcgctcc tccaagccag ttacctcggt  
 tcaaagagtt  
 14821 ggtagctcag agaaccttcg aaaaaccgcc ctgcaaggcg gttttttcgt  
 tttcagagca  
 14881 agagattacg cgcagaccaa aacgatctca agaagatcat cttattaagg  
 ggtctgacgc  
 14941 tcagtggaaac gaaaactcac gttaagggat tttgggtcatg agattatcaa  
 aaaggatctt  
 15001 cacctagatc ctttttaaatt aaaaatgaag ttttaaataca atctaaagta  
 tatatgagta  
 15061 aacttgggtct gacagttacc aatgcttaat cagtgaggca cctatctcag  
 cgatctgtct  
 15121 atttcgttca tccatagttg cctgactccc cgtcgtgtag ataactacga  
 tacgggaggg  
 15181 cttaccatct ggccccagtg ctgcaatgat accgcgagac ccacgctcac  
 cggctccaga  
 15241 tttatcagca ataaaccagc cagccggaag ggccgagcgc agaagtggtc  
 ctgcaacttt  
 15301 atccgcctcc atccagtcta ttaattgttg ccgggaagct agagtaagta  
 gttcgccagt  
 15361 taatagtttg cgcaacgttg ttgccattgc tgcaggcatc gtgggtgtcac  
 gctcgtcgtt  
 15421 tggtatggct tcattcagct ccggttccca acgatcaagg cgagttacat  
 gatecccat  
 15481 gttgtgcaaa aaagcgggta gtccttcgg tcctccgacg gttgtcagaa  
 gtaagttggc  
 15541 cgcagtgtta tcaactcatg ttatggcagc actgcataat tctcttactg  
 tcatgccatc  
 15601 cgtaagatgc ttttctgtga ctggtgagta ctcaaccaag tcattctgag  
 aatagtgtat  
 15661 gcggcgaccg agttgctctt gcccggcgtc aacacgggat aataccgcgc  
 cacatagcag  
 15721 aactttaaaa gtgctcatca ttggaaaacg ttcttcgggg cgaaaactct  
 caaggatctt  
 15781 accgctgttg agatccagtt cgatgtaacc cactcgtgca cccaactgat  
 cttcagcatc  
 15841 ttttactttc accagcgttt ctgggtgagc aaaaacagga aggcaaaatg  
 ccgcaaaaaa  
 15901 gggaataagg gcgacacgga aatgttgaat actcactatc ttcctttttc  
 aatattattg  
 15961 aagcatttat cagggttatt gtctcatgag cggatacata tttgaatgta  
 tttagaaaaa  
 16021 taaacaaata ggggttccgc gcacatttcc ccgaaaagtg ccacctgacg  
 tgtcgacgcg  
 16081 gccgcacatt gattattgac tagttattaa tagtaatcaa ttacgggggtc  
 attagttcat  
 16141 agcccatata tggagttccg cgttacataa cttacggtaa atggcccgc  
 tggctgaccg  
 16201 cccaacgacc cccgcccatt gacgtcaata atgacgtatg ttcccatagt  
 aacgccaata

16261 gggactttcc attgacgtca atgggtggag tatttacggt aaactgcca  
cttggcagta  
16321 catcaagtgt atcatatgcc aagtccgccc cctattgacg tcaatgacgg  
taaattggccc  
16381 gcctggcatt atgcccagta catgacctta cgggactttc ctacttggca  
gtacatctac  
16441 gtattagtca tcgctattac catggtgatg cggttttggc agtacaccaa  
tgggcgtgga  
16501 tagcggtttg actcacgggg atttccaagt ctccaccca ttgacgtcaa  
tgggagtttg  
16561 ttttggcacc aaaatcaacg ggactttcca aaatgtcgta ataaccgcg  
cccgttgacg  
16621 caaatgggcg gtaggcgtgt acggtgggag gtctatataa gcagagctcg  
tttagtgaac  
16681 cg  
//

**Figure S6.** Nucleotide sequence of the cTC-83/TrD molecular infectious clone

LOCUS cTC-83\_TrD 16682 bp DNA circular 10-JAN-2022

SOURCE

ORGANISM

FEATURES Location/Qualifiers

rep\_origin 14366..14911  
/vntifkey="33"  
/label=p15A\origin\of replication  
CDS complement(15076..15936)  
/vntifkey="4"  
/label=Ap  
polyA\_signal 11965..12550  
/vntifkey="25"  
/label=PolyA\signal\from\HGH\human\growth\hormone)  
misc\_feature 12635..12937  
/vntifkey="21"  
/label=SV40\ori  
promoter 16111..16682  
/vntifkey="29"  
/label=CMV\promoter  
misc\_RNA 11473..11556  
/vntifkey="53"  
/label=Antigenomic\RBZ\HDV  
misc\_feature 11965..4  
/vntifkey="21"  
/label=plasmid\vector  
CDS 8564..9832  
/vntifkey="4"  
/label=E2  
CDS 9833..10000  
/product="6K protein"  
/vntifkey="4"  
/label=6k  
/note="putative"  
CDS 8387..8563  
/product="E3"  
/function="incorporated into the envelope of some alpha  
viruses"  
/vntifkey="4"  
/label=E3  
/note="putative"  
CDS 5703..7523  
/product="nsP4"  
/function="replication"  
/vntifkey="4"  
/label=nsP4  
/note="putative"  
CDS 4032..5702  
/product="nsP3"  
/function="replication"  
/vntifkey="4"



```

        /label=nsP3
        /note="putative"
CDS      1650..4031
        /product="nsP2"
        /function="replication"
        /vntifkey="4"
        /label=nsP2
        /note="putative"
CDS      45..1649
        /product="nsP1"
        /vntifkey="4"
        /label=nsP1
        /note="putative"
5'UTR    1..44
        /vntifkey="52"
        /label=5'UTR
promoter  7501..7545
        /vntifkey="29"
        /label=Subgenomic\promoter\ (SP)
CDS      7562..8386
        /vntifkey="4"
        /label=C
CDS      10001..11326
        /vntifkey="4"
        /label=E1
CDS      13015..13806
        /vntifkey="4"
        /label=Neo
mutation  3..3
        /vntifkey="62"
        /label=A->G\ (TrD)
mutation  8922..8922
        /vntifkey="62"
        /label=G->C\ (Arg->Tre)\ (TrD)
BASE COUNT  4480 a   4164 c   4211 g   3827 t
ORIGIN
      1 atgggcgggcg catgagagaa gcccagacca attacctacc caaaatggag
aaagttcacg
     61 ttgacatcga ggaagacagc ccattcctca gagctttgca gcggagcttc
ccgcagtttg
    121 aggtagaagc caagcaggtc actgataatg accatgctaa tgccagagcg
ttttcgcac
    181 tggcttcaaa actgatcgaa acggagggtg acccatccga cacgatcctt
gacattggaa
    241 gtgcgcccgc ccgcagaatg tattctaagc acaagtatca ttgtatctgt
ccgatgagat
    301 gtgcggaaga tccggacaga ttgtataagt atgcaactaa gctgaagaaa
aactgtaagg
    361 aaataactga taaggaattg gacaagaaaa tgaaggagct cgccgcccgtc
atgagcgacc
    421 ctgacctgga aactgagact atgtgcctcc acgacgacga gtcgtgtcgc
tacgaagggc

```

481 aagtcgctgt ttaccaggat gtatacgcgg ttgacggacc gacaagtctc  
 tatcaccaag  
 541 ccaataaggg agttagagtc gcctactgga taggctttga caccaccct  
 tttatgttta  
 601 agaacttggc tggagcatat ccatcact ctaccaactg ggccgacgaa  
 accgtgttaa  
 661 cggctcgtaa cataggccta tgcagctctg acgttatgga gcggtcacgt  
 agagggatgt  
 721 ccattcttag aaagaagtat ttgaaacat ccaacaatgt tctattctct  
 gttggctcga  
 781 ccatctacca cgagaagagg gacttactga ggagctggca cctgccgtct  
 gtatttcact  
 841 tacgtggcaa gcaaaattac acatgtcggg gtgagactat agttagttgc  
 gacgggtacg  
 901 tcgttaaaag aatagctatc agtccaggcc tgtatgggaa gccttcaggc  
 tatgctgcta  
 961 cgatgcaccg cgagggattc ttgtgctgca aagtgcaga cacattgaac  
 ggggagaggg  
 1021 tctcttttcc cgtgtgcacg tatgtgccag ctacattgtg tgaccaaatg  
 actggcatac  
 1081 tggcaacaga tgtcagtgcg gacgacgcgc aaaaactgct ggttgggctc  
 aaccagcgta  
 1141 tagtcgtcaa cggtcgcacc cagagaaaca ccaataccat gaaaaattac  
 cttttgcccg  
 1201 tagtggccca ggcatttgct aggtgggcaa aggaatataa ggaagatcaa  
 gaagatgaaa  
 1261 ggccactagg actacgagat agacagttag tcatgggggtg ttgttgggct  
 tttagaaggc  
 1321 acaagataac atctatttat aagcgcccgg atacccaaac catcatcaaa  
 gtgaacacg  
 1381 atttccactc attcgtgctg cccaggatag gcagtaacac attggagatc  
 gggctgagaa  
 1441 caagaatcag gaaaatgtta gaggagcaca aggagccgtc acctctcatt  
 accgccgagg  
 1501 acgtacaaga agctaagtgc gcagccgatg aggctaagga ggtgcgtgaa  
 gccgaggagt  
 1561 tgcgcgcagc tctaccacct ttggcagctg atgttgagga gccactctg  
 gaagccgatg  
 1621 tcgacttgat gttacaagag gctggggccg gctcagtgga gacacctcgt  
 ggcttgataa  
 1681 aggttaccag ctacgatggc gaggacaaga tcggctctta cgctgtgctt  
 tctccgcagg  
 1741 ctgtactcaa gagtgaaaaa ttatcttgca tccaccctct cgctgaacaa  
 gtcatagtga  
 1801 taacacactc tggccgaaaa gggcgttatg ccgtggaacc ataccatggg  
 aaagtagtgg  
 1861 tgccagaggg acatgcaata cccgtccagg actttcaagc tctgagtga  
 agtgccacca  
 1921 ttgtgtacaa cgaacgtgag ttcgtaaaca ggtacctgca ccatattgcc  
 acacatggag  
 1981 gagcgctgaa cactgatgaa gaatattaca aaactgtcaa gcccgagcag  
 cagcagcg

2041 aatacctgta cgacatcgac aggaacacagt gcgtcaagaa agaactagtc  
 actgggctag  
 2101 ggctcacagg cgagctgggtg gatcctccct tccatgaatt cgcctacgag  
 agtctgagaa  
 2161 caccgaccagc cgctccttac caagtaccaa ccataggggt gtatggcggtg  
 ccaggatcag  
 2221 gcaagtctgg catcattaaa agcgcagtca ccaaaaaaga tctagtgggtg  
 agcgccaaga  
 2281 aagaaaactg tgcagaaatt ataagggacg tcaagaaaat gaaagggctg  
 gacgtcaatg  
 2341 ccagaactgt ggactcagtg ctcttgaatg gatgcaaaca ccccgtagag  
 accctgtata  
 2401 ttgacgaagc ttttgcttgt catgcaggta ctctcagagc gctcatagcc  
 attataagac  
 2461 ctaaaaaggc agtgctctgc ggggatccca aacagtgcgg tttttttaac  
 atgatgtgcc  
 2521 tgaaagtgca ttttaaccac gagatttgca cacaagtctt ccacaaaagc  
 atctctcgcc  
 2581 gttgcactaa atctgtgact tcggtcgtct caaccttggt ttacgacaaa  
 aaaatgagaa  
 2641 cgacgaatcc gaaagagact aagattgtga ttgacactac cggcagtacc  
 aaacctaagc  
 2701 aggacgatct cattctcact tgtttcagag ggtgggtgaa gcagttgcaa  
 atagattaca  
 2761 aaggcaacga aataatgacg gcagctgcct ctcaagggct gacccgtaaa  
 ggtgtgtatg  
 2821 ccgttcggta caaggtgaat gaaaatcctc tgtacgcacc cacctcagaa  
 catgtgaacg  
 2881 tcctactgac ccgcacggag gaccgcatcg tgtggaaaac actagccggc  
 gacccatgga  
 2941 taaaaacact gactgccaaag taccctggga atttactgc cacgatagag  
 gagtggcaag  
 3001 cagagcatga tgccatcatg aggcacatct tggagagacc ggaccctacc  
 gacgtcttcc  
 3061 agaataaggc aaacgtgtgt tgggccaaagg ctttagtgcc ggtgctgaag  
 accgctggca  
 3121 tagacatgac cactgaacaa tggaacactg tggattatct tgaaacggac  
 aaagctcact  
 3181 cagcagagat agtattgaac caactatgcg tgaggttctt tggactcgat  
 ctggactccg  
 3241 gtctatcttc tgcacccact gttccgttat ccattaggaa taatcactgg  
 gataactccc  
 3301 cgtcgcctaa catgtacggg ctgaataaag aagtgggtccg tcagctctct  
 cgcaggtacc  
 3361 cacaactgcc tcgggcagtt gccactggaa gagtctatga catgaacact  
 ggtacactgc  
 3421 gcaattatga tccgcgcata aacctagtac ctgtaaacag aagactgcct  
 catgctttag  
 3481 tcctccacca taatgaacac ccacagagtg acttttcttc attcgtcagc  
 aaattgaagg  
 3541 gcagaactgt cctggtgggtc ggggaaaagt tgtccgtccc aggcaaatg  
 gttgactggt

3601 tgtcagaccg gcctgaggct accttcagag ctcggtgga tttaggcatc  
 ccagggtgatg  
 3661 tgcccaaata tgacataata tttgttaatg tgaggacccc atataaatac  
 catcactatc  
 3721 agcagtgtga agaccatgcc attaagctta gcatgttgac caagaaagct  
 tgtctgcatc  
 3781 tgaatcccgg cggaacctgt gtcagcatag gttatggtta cgctgacagg  
 gccagcgaag  
 3841 gcatcattgg tgctatagcg cggcagttca agttttcccg ggtatgcaaa  
 ccgaaatcct  
 3901 cacttgaaga gacggaagtt ctgtttgtat tcattgggta cgatcgcaag  
 gcccgtagcg  
 3961 acaatcctta caagctttca tcaaccttga ccaacattta tacagggttc  
 agactccacg  
 4021 aagccggatg tgcaccctca tatcatgtgg tgcgagggga tattgccacg  
 gccaccgaag  
 4081 gagtgattat aaatgctgct aacagcaaag gacaacctgg cggaggggtg  
 tgcggagcgc  
 4141 tgtataagaa attcccggaa agcttcgatt tacagccgat cgaagtagga  
 aaagcgcgac  
 4201 tgggtcaaagg tgcagctaaa catatcattc atgccgtagg accaaacttc  
 aacaaagttt  
 4261 cggagggttg aggtgacaaa cagttggcag aggcttatga gtccatcgct  
 aagattgtca  
 4321 acgataacaa ttacaagtca gtagcgattc cactgttgct caccggcatc  
 ttttccggga  
 4381 acaaagatcg actaacccaa tcattgaacc atttgctgac agctttagac  
 accactgatg  
 4441 cagatgtagc catatactgc agggacaaga aatgggaaat gactctcaag  
 gaagcagtgg  
 4501 ctaggagaga agcagtggag gagatatgca tatccgacga ctcttcagtg  
 acagaacctg  
 4561 atgcagagct ggtgaggggtg catccgaaga gttctttggc tggaaggaag  
 ggctacagca  
 4621 caagcgatgg caaaactttc tcatatttgg aagggaccaa gtttcaccag  
 gcggccaagg  
 4681 atatagcaga aattaatgcc atgtggcccg ttgcaacgga ggccaatgag  
 caggtatgca  
 4741 tgtatatacct cggagaaagc atgagcagta ttaggtcgaa atgccccgtc  
 gaagagtcgg  
 4801 aagcctccac accacctagc acgctgcctt gcttgtgcat ccatgccatg  
 actccagaaa  
 4861 gagtacagcg cctaaaagcc tcacgtccag aacaaattac tgtgtgctca  
 tcctttccat  
 4921 tgccgaagta tagaatcact ggtgtgcaga agatccaatg ctcccagcct  
 atattgttct  
 4981 caccgaaagt gcctgcgtat attcatccaa ggaagtatct cgtggaacaa  
 ccaccggtag  
 5041 acgagactcc ggagccatcg gcagagaacc aatccacaga ggggacacct  
 gaacaaccac  
 5101 cacttataac cgaggatgag accaggacta gaacgcctga gccgatcatc  
 atcgaagagg

5161 aagaagagga tagcataagt ttgctgtcag atggcccgcac ccaccagggtg  
 ctgcaagtgcg  
 5221 aggcagacat tcacggggccg ccctctgtat ctagctcatc ctgggtccatt  
 cctcatgcat  
 5281 ccgactttga tgtggacagt ttatccatac ttgacaccct ggagggagct  
 agcgtgacca  
 5341 gcggggcaac gtcagccgag actaactctt acttcgcaaa gagtatggag  
 tttctggcgc  
 5401 gaccggtgcc tgcgcctcga acagtattca ggaaccctcc acatcccgc  
 ccgcgcacaa  
 5461 gaacaccgtc acttgcaccc agcagggcct gctcgagaac cagcctagtt  
 tccaccccgc  
 5521 caggcgtgaa taggggtgatc actagagagg agctcgaggc gcttaccgcc  
 tcacgcactc  
 5581 ctagcaggtc ggtctcgaga accagcctgg tctccaaccc gccaggcgta  
 aatagggtga  
 5641 ttacaagaga ggagtttgag gcgttcgtag cacaacaaca atgacgggtt  
 gatgcgggtg  
 5701 catacatctt ttcctccgac accgggtcaag ggcatttaca acaaaaatca  
 gtaaggcaaa  
 5761 cggtgctatc cgaagtgggtg ttggagagga ccgaattgga gatttcgtat  
 gccccgcgc  
 5821 tcgaccaaga aaaagaagaa ttactacgca agaaattaca gttaaattccc  
 acacctgcta  
 5881 acagaagcag ataccagtc aggaagggtgg agaacatgaa agccataaca  
 gctagacgta  
 5941 ttctgcaagg cctagggcat tatttgaagg cagaaggaaa agtggagtgc  
 taccgaaccc  
 6001 tgcattcctgt tcctttgtat tcattctagt tgaaccgtgc cttttcaagc  
 cccaagggtc  
 6061 cagtggaaagc ctgtaacgcc atgttgaaag agaactttcc gactgtgggt  
 tcttactgta  
 6121 ttattccaga gtacgatgcc tatttggaca tggttgacgg agcttcatgc  
 tgcttagaca  
 6181 ctgccagttt ttgccctgca aagctgcgca gctttccaaa gaaacactcc  
 tatttggaaac  
 6241 ccacaatacg atcggcagtg ccttcagcga tccagaacac gctccagaac  
 gtccctggcag  
 6301 ctgccacaaa aagaaattgc aatgtcacgc aaatgagaga attgcccgtg  
 ttggattcgg  
 6361 cggcctttta tgtggaatgc ttcaagaaat atgcgtgtaa taatgaatat  
 tgggaaacgt  
 6421 ttaaagaaaa ccccatcagg cttactgaag aaaacgtgggt aaattacatt  
 accaaattaa  
 6481 aaggaccaa agctgctgct ctttttgcca agacacataa tttgaatatg  
 ttgcaggaca  
 6541 taccaatgga caggtttgta atggacttaa agagagacgt gaaagtgact  
 ccaggaacaa  
 6601 aacatactga agaacggccc aaggtacagg tgatccaggc tgccgatccg  
 ctagcaacag  
 6661 cgtatctgtg cggaatccac cgagagctgg ttaggagatt aaatgcggtc  
 ctgcttccga



6721 acattcatac actgtttgat atgtcggctg aagactttga cgctattata  
 gccgagcact  
 6781 tccagcctgg ggattgtgtt ctggaaactg acatcgcgtc gtttgataaa  
 agtgaggacg  
 6841 acgccatggc tctgaccgcg ttaatgattc tggaagactt aggtgtggac  
 gcagagctgt  
 6901 tgacgctgat tgaggcggct ttcggcgaaa tttcatcaat acatttgccc  
 actaaaacta  
 6961 aattttaaatt cggagccatg atgaaatctg gaatgttcct cacactgttt  
 gtgaacacag  
 7021 tcattaacat tgtaatcgca agcagagtgt tgagagaacg gctaaccgga  
 tcaccatgtg  
 7081 cagcattcat tggagatgac aatatcgtga aaggagtcaa atcggacaaa  
 ttaatggcag  
 7141 acaggtgcg cacctggttg aatatggaag tcaagattat agatgctgtg  
 gtgggcgaga  
 7201 aagcgcctta tttctgtgga gggtttattt tgtgtgactc cgtgaccggc  
 acagcgtgcc  
 7261 gtgtggcaga cccctaataa aggctgttta agcttggaac acctctggca  
 gcagacgatg  
 7321 aacatgatga tgacaggaga agggcattgc atgaagagtc aacacgctgg  
 aaccgagtgg  
 7381 gtattctttc agagctgtgc aaggcagtag aatcaaggta tgaaaccgta  
 ggaacttcca  
 7441 tcatagttat ggccatgact actctagcta gcagtgttaa atcattcagc  
 tacctgagag  
 7501 gggcccctat aactctctac ggctaacctg aatggactac gacatagtct  
 agtccgcaa  
 7561 gatgttcccg ttccagccaa tgtatccgat gcagccaatg ccctatcgca  
 acccgttcgc  
 7621 ggccccgcgc aggccctggg tccccagAAC cgaccctttt ctggcgatgc  
 aggtgcagga  
 7681 attaaccgc tcgatggcta acctgacgtt caagcaacgc cgggacgcgc  
 cacctgaggg  
 7741 gccatccgct aagaaaccga agaaggaggc ctcgcaaaaa cagaaagggg  
 gaggccaagg  
 7801 gaagaagaag aagaaccaag ggaagaagaa ggctaagaca gggccgccta  
 atccgaaggc  
 7861 acagaatgga aacaagaaga agaccaacaa gaaaccaggc aagagacagc  
 gcatggtcat  
 7921 gaaattggaa tctgacaaga cgttcccaat catgttggaa ggggaagataa  
 acggctacgc  
 7981 ttgtgtggtc ggagggaagt tattcaggcc gatgcatgtg gaaggcaaga  
 tcgacaacga  
 8041 cgttctggcc gcgcttaaga cgaagaaagc atccaaatac gatcttgagt  
 atgcagatgt  
 8101 gccacagaac atgcggggcg atacattcaa atacacccat gagaaacccc  
 aaggctatta  
 8161 cagctggcat catggagcag tccaatatga aaatgggcgt ttcacggtgc  
 cgaaaggagt  
 8221 tggggccaag ggagacagcg gacgacccat tctggataac cagggacggg  
 tggtcgctat

8281 tgtgctggga ggtgtgaatg aaggatctag gacagccctt tcagtcgtca  
 tgtggaacga  
 8341 gaagggagtt accgtgaagt atactccgga gaactgcgag caatggtcac  
 tagtgaccac  
 8401 catgtgtctg ctgcaccaatg tgacgttccc atgtgctcaa ccaccaattt  
 gctacgacag  
 8461 aaaaccagca gagactttgg ccatgctcag cgtaaacgtt gacaaccg  
 gctacgatga  
 8521 gctgctggaa gcagctgtta agtgccccgg aaggaaaagg agatccaccg  
 aggagctggt  
 8581 taatgagtat aagctaacgc gcccttacat ggccagatgc atcagatgtg  
 cagttgggag  
 8641 ctgccatagt ccaatagcaa tcgaggcagt aaagagcgac gggcacgacg  
 gttatgttag  
 8701 acttcagact tcctcgcagt atggcctgga ttctccggc aacttaaagg  
 gcaggaccat  
 8761 gcggtatgac atgcacggga ccattaaaga gataccacta catcaagtgt  
 cactctatac  
 8821 atctcgcccg tgtcacattg tggatgggca cggttatttc ctgcttgcca  
 ggtgccccggc  
 8881 aggggactcc atcaccatgg aatttaagaa agattccgtc acacactcct  
 gctcggtgcc  
 8941 gtatgaagtg aaatttaatc ctgtaggcag agaactctat actcatcccc  
 cagaacacgg  
 9001 agtagagcaa gcgtgccaa tctacgcaca tgatgcacag aacagaggag  
 cttatgtcga  
 9061 gatgcacctc ccgggctcag aagtggacag cagtttggtt tccttgagcg  
 gcagttcagt  
 9121 caccgtgaca cctcctgatg ggactagcgc cctgggtggaa tgcgagtgtg  
 gcggcacaaa  
 9181 gatctccgag accatcaaca agacaaaaca gttcagccag tgcacaaaga  
 aggagcagtg  
 9241 cagagcatat cggctgcaga acgataagtg ggtgtataat tctgacaaac  
 tgcccaaagc  
 9301 agcgggagcc accttaaaag gaaaactgca tgtcccatc ttgctggcag  
 acggcaaagt  
 9361 caccgtgcct ctagcaccag aacctatgat aaccttcggt ttcagatcag  
 tgtcactgaa  
 9421 actgcaccct aagaatccca catatctaata caccgcca cttgctgatg  
 agcctcacta  
 9481 cacgcacgag ctcatatctg aaccagctgt taggaatttt accgtcaccg  
 aaaaagggtg  
 9541 ggagtttgta tggggaaacc acccgccgaa aaggttttgg gcacaggaaa  
 cagcaccg  
 9601 aaatccacat gggctaccgc acgaggtgat aactcattat taccacagat  
 accctatgtc  
 9661 caccatcctg ggtttgctcaa tttgtgccgc cattgcaacc gtttccgttg  
 cagcgtctac  
 9721 ctggctgttt tgcagatcta gagttgcgtg cctaactcct taccggctaa  
 cacctaacgc  
 9781 taggatacca ttttgtctgg ctgtgctttg ctgcgccccg actgccccgg  
 ccgagaccac

9841 ctgggagtc tggatcacc tatggaacaa taaccaacag atgttctgga  
 ttcaattgct  
 9901 gatccctctg gccgccttga tcgtagtgac tcgcctgctc aggtgcgtgt  
 gctgtgtcgt  
 9961 gcctttttta gtcatggccg gcgccgcagg cgccggcgcc tacgagcacg  
 cgaccacgat  
 10021 gccgagccaa gcgggaatct cgtataacac tatagtcaac agagcaggct  
 acgcaccact  
 10081 ccctatcagc ataacaccaa caaagatcaa gctgatacct acagtgaact  
 tggagtacgt  
 10141 cacctgccac tacaaaacag gaatggattc accagccatc aaatgctgcg  
 gatctcagga  
 10201 atgcactcca acttacaggc ctgatgaaca gtgcaaagtc ttcacagggg  
 tttaccggtt  
 10261 catgtggggg ggtgcatatt gcttttgca cactgagaac acccaagtca  
 gcaaggccta  
 10321 cgtaatgaaa tctgacgact gccttgcgga tcatgctgaa gcatataaag  
 cgcacacagc  
 10381 ctcaagtgcag gcgttcctca acatcacagt gggagaacac tctattgtga  
 ctaccgtgta  
 10441 tgtgaatgga gaaactcctg tgaatttcaa tgggggtcaaa ataactgcag  
 gtccgctttc  
 10501 cacagcttgg acaccctttg atcgcaaaat cgtgcagtat gccggggaga  
 tctataatta  
 10561 tgattttcct gagtatgggg caggacaacc aggagcattt ggagatatac  
 aatccagaac  
 10621 agtctcaagc tctgatctgt atgccaatac caacctagtg ctgcagagac  
 ccaaagcagg  
 10681 agcgatccac gtgccataca ctcaggcacc ttcgggtttt gagcaatgga  
 agaaagataa  
 10741 agctccatca ttgaaattta ccgccccttt cggatgcgaa atatatacaa  
 accccattcg  
 10801 cgccgaaaac tgtgctgtag ggtcaattcc attagccttt gacattcccg  
 acgccttggt  
 10861 caccaggggtg tcagaaacac cgacactttc agcgggccgaa tgcactctta  
 acgagtgcgt  
 10921 gtattcttcc gactttggtg ggatcgccac ggtcaagtac tcggccagca  
 agtcaggcaa  
 10981 gtgcgcagtc catgtgccat cagggactgc taccctaaaa gaagcagcag  
 tcgagctaac  
 11041 cgagcaaggg tcggcgacta tccatttctc gaccgcaa atccaccgg  
 agttcaggct  
 11101 ccaaatatgc acatcatatg ttacgtgcaa aggtgattgt cccccccga  
 aagaccatat  
 11161 tgtgacacac cctcagtatc acgcccacaa atttacagcc gcgggtgtcaa  
 aaaccgcgtg  
 11221 gacgtgggta acatccctgc tgggaggatc agccgtaatt attataattg  
 gcttggtgct  
 11281 ggctactatt gtggccatgt acgtgctgac caaccagaaa cataattgaa  
 tacagcagca  
 11341 attggcaagc tgcttacata gaactcgcg cgattggcat gccgccttaa  
 aatttttatt

11401 ttatTTTTtct tttctTTTTcc gaatcggatt ttgtTTTTtaa tatttcaaaa  
 aaaaaaaaaa  
 11461 aaaaaaaaaa aagggtcggc atggcatctc cacctcctcg cgggccgacc  
 tgggcatccg  
 11521 aaggaggacg cacgtccact cggatggcta agggagagcc acgagctcct  
 cgacagatca  
 11581 taatcagcca taccacattt gtagaggttt tacttgcttt aaaaaacctc  
 ccacacctcc  
 11641 ccctgaacct gaaacataaa atgaatgcaa ttgttggttg taacttgttt  
 attgcagctt  
 11701 ataatgggta caaataaagc aatagcatca caaatTTTcac aaataaagca  
 tttttttcac  
 11761 tgcattctag ttgtggtttg tccaaactca tcaagatacg cgtacgcggc  
 cccatggtcg  
 11821 ctttccgccg cgtggaggag gatcacagca acaccgagct gggcatcgtg  
 gagtaccagc  
 11881 acgccttcaa gaccccgat gcagatgccg gtgaagaaag agtttaaacg  
 gccggccgcg  
 11941 gtcatagctg tttcctgaac agatcccggg tggcatccct gtgaccctc  
 cccagtgcct  
 12001 ctctggccc tggaagtgc cactccagtg cccaccagcc ttgtccta  
 aaaattaagt  
 12061 tgcattctt tgtctgacta ggtgtccttc tataatatta tgggggtggag  
 gggggtggta  
 12121 tggagcaagg ggcaagtgg gaagacaacc tgtagggcct gcgggggtcta  
 ttgggaacca  
 12181 agctggagtg cagtggcaca atcttggctc actgcaatct ccgcctcctg  
 ggttcaagcg  
 12241 attctcctgc ctccagctcc cgagttgttg ggattccagg catgcatgac  
 caggctcagc  
 12301 taatTTTTgt ttttttggtg gagacggggg ttcaccatat tggccaggct  
 ggtctccaac  
 12361 tcctaattctc aggtgatcta cccaccttgg cctcccaa  
 acaggcgtga  
 12421 accactgctc ccttcctgt ccttctgatt ttaaaataac tataccagca  
 ggaggacgtc  
 12481 cagacacagc ataggctacc tggccatgcc caaccggtgg gacatttgag  
 ttgcttgctt  
 12541 ggcactgtcc tctcatgcgt tgggtccact cagtagatgc ctggtgaatt  
 gggtagcggg  
 12601 ccagcttggc tgtggaatgt gtgtcagtta ggggtgtggaa agtccccagg  
 ctccccagca  
 12661 ggcagaagta tgcaaagcat gcattctaat tagtcagcaa ccagggtgtg  
 aaagtcccca  
 12721 ggctccccag caggcagaag tatgcaaagc atgcattctc attagtcagc  
 aaccatagtc  
 12781 ccgcccctaa ctccgcccac cccgccccta actccgccc  
 ttctccgccc  
 12841 catggctgac taatTTTTTT tatttatgca gaggccgagg ccgcctcggc  
 ctctgagcta  
 12901 ttccagaagt agtgaggagg cttttttgga ggcctaggct tttgcaaaaa  
 gctcccgga

12961 gcttgtatat ccatttttcgg atctgatcaa gagacaggat gaggatcgtt  
 tcgcatgatt  
 13021 gaacaagatg gattgcacgc aggttctccg gccgcttggg tggagaggct  
 attcggctat  
 13081 gactgggcac aacagacaat cggctgctct gatgccgccg tgttccggct  
 gtcagcgcag  
 13141 gggcgcccgg ttctttttgt caagaccgac ctgtccggtg ccttgaatga  
 actgcaggac  
 13201 gaggcagcgc ggctatcgtg gctggccacg acgggcggtc cttgcgcagc  
 tgtgctcgac  
 13261 gttgtcactg aagcgggaag ggactggctg ctattgggcg aagtgccggg  
 gcaggatctc  
 13321 ctgtcatctc accttgctcc tgccgagaaa gtatccatca tggctgatgc  
 aatgcggcgg  
 13381 ctgcatacgc ttgatccggc tacctgcca ttcgaccacc aagcgaaaca  
 tcgcatcgag  
 13441 cgagcacgta ctcggatgga agccggtctt gtcgatcagg atgatctgga  
 cgaagagcat  
 13501 caggggctcg cgccagccga actgttcgcc aggctcaagg cgcgcatgcc  
 cgacggcgag  
 13561 gatctcgtcg tgacccatgg cgatgcctgc ttgccgaata tcatggtgga  
 aaatggccgc  
 13621 ttttctggat tcatcgactg tggccggctg ggtgtggccg accgctatca  
 ggacatagcg  
 13681 ttggctaccc gtgatattgc tgaagagctt ggcggcgaat gggctgaccg  
 ctctctcgtg  
 13741 ctttacggta tcgccgctcc cgattcgcag cgcatcgct tctatcgct  
 tcttgacgag  
 13801 ttcttctgag cgggactctg gggttcgaaa tgaccgacca agcgacgccc  
 aacctgccat  
 13861 cacgagatth cgattccacc gccgccttct atgaaagggtt gggcttcgga  
 atcgttttcc  
 13921 gggacgccgg ctggatgatc ctccagcgcg gggatctcat gctggagttc  
 ttcgcccacc  
 13981 ccaacttggt tattgcagct tataatggtt acaaataaag caatagcatc  
 acaaatttca  
 14041 caaataaagc atttttttca ctgcattcta gttgtggttt gtccaaactc  
 atcaatgtat  
 14101 cttatcatgt ctgtatactg gcttactatg ttggcactga tgagggtgtc  
 agtgaagtgc  
 14161 ttcattgtggc aggagaaaaa aggctgcacc ggtgcgtcag cagaatatgt  
 gatacaggat  
 14221 atattccgct tcctcgctca ctgactcgct acgctcggtc gttcgactgc  
 ggcgagcgga  
 14281 aatggcttac gaacggggcg gagatttcct ggaagatgcc aggaagatac  
 ttaacaggga  
 14341 agtgagaggg ccgcggcaaa gccgtttttc cataggctcc gccccctga  
 caagcatcac  
 14401 gaaatctgac gctcaaata gtggtggcga aaccgcacag gactataaag  
 ataccaggcg  
 14461 tttcccctgg cggctccctc gtgcgctctc ctgttcctgc ctttcggttt  
 accggtgtca

14521 ttccgctggt atggccgcgt ttgtctcatt ccacgcctga cactcagttc  
cgggtaggca  
14581 gttcgctcca agctggactg tatgcacgaa cccccggttc agtccgaccg  
ctgcgcctta  
14641 tccggtaact atcgtcttga gtccaacccg gaaagacatg caaaagcacc  
actggcagca  
14701 gccactggta attgatttag aggagttagt cttgaagtca tgcgccgggt  
aaggctaaac  
14761 tgaaaggaca agttttggtg actgcgctcc tccaagccag ttacctcggt  
tcaaagagtt  
14821 ggtagctcag agaaccttcg aaaaaccgcc ctgcaaggcg gttttttcgt  
tttcagagca  
14881 agagattacg cgcagaccaa aacgatctca agaagatcat cttattaagg  
ggtctgacgc  
14941 tcagtggaaac gaaaactcac gttaagggat tttgggtcatg agattatcaa  
aaaggatctt  
15001 cacctagatc cttttaaatt aaaaatgaag ttttaaatac atctaaagta  
tatatgagta  
15061 aacttggtct gacagttacc aatgcttaat cagtgaggca cctatctcag  
cgatctgtct  
15121 atttcgttca tccatagttg cctgactccc cgtcgtgtag ataactacga  
tacgggaggg  
15181 cttaccatct ggccccagtg ctgcaatgat accgcgagac ccacgctcac  
cggctccaga  
15241 tttatcagca ataaaccagc cagccggaag ggccgagcgc agaagtgggtc  
ctgcaacttt  
15301 atccgcctcc atccagtcta ttaattggtg ccgggaagct agagtaagta  
gttcgccagt  
15361 taatagtttg cgcaacgttg ttgccattgc tgcaggcatc gtggtgtcac  
gctcgtcgtt  
15421 tgggtatggc tcattcagct ccggttccca acgatcaagg cgagttacat  
gatccccat  
15481 gttgtgcaaa aaagcgggta gtccttcggt tcttccgata gttgtcagaa  
gtaagttggc  
15541 cgcagtgtta tcaactcatg ttatggcagc actgcataat tctcttactg  
tcatgccatc  
15601 cgtaagatgc ttttctgtga ctggtgagta ctcaaccaag tcattctgag  
aatagtgtat  
15661 gcggcgaccg agttgctctt gcccggcgtc aacacgggat aataccgcgc  
cacatagcag  
15721 aactttaaaa gtgctcatca ttggaaaacg ttcttcgggg cgaaaactct  
caaggatctt  
15781 accgctgttg agatccagtt cgatgtaacc cactcgtgca cccaactgat  
cttcagcatc  
15841 ttttactttc accagcgttt ctgggtgagc aaaaacagga aggcaaatg  
ccgcaaaaaa  
15901 gggaataagg gcgacacgga aatgttgaat actcatactc ttcctttttc  
aatattattg  
15961 aagcatttat cagggttatt gtctcatgag cggatacata tttgaatgta  
tttagaaaaa  
16021 taaacaaata ggggttccgc gcacatttcc ccgaaaagtg ccacctgacg  
tgctgacgcg

16081 gccgcacatt gattattgac tagttattaa tagtaatcaa ttacggggtc  
attagttcat  
16141 agcccatata tggagttccg cgttacataa cttacggtaa atggcccgcc  
tggctgaccg  
16201 cccaacgacc cccgcccatt gacgtcaata atgacgtatg ttcccatagt  
aacgccaata  
16261 gggactttcc attgacgtca atgggtggag tatttacggg aaactgcca  
cttggcagta  
16321 catcaagtgt atcatatgcc aagtccgcc cctattgacg tcaatgacgg  
taaattggccc  
16381 gcctggcatt atgcccagta catgacctta cgggactttc ctacttggca  
gtacatctac  
16441 gtattagtca tcgctattac catggtgatg cggttttggc agtacaccaa  
tgggcgtgga  
16501 tagcggtttg actcacgggg atttccaagt ctccaccca ttgacgtcaa  
tgggagtttg  
16561 ttttggcacc aaaatcaacg ggactttcca aaatgtcgta ataacccgc  
cccgttgacg  
16621 caaatgggcg gtaggcgtgt acggtgggag gtctatataa gcagagctcg  
ttagtgaac  
16681 cg

//

**Figure S7.** Nucleotide sequence of the cTC-83/TrD-GFP molecular infectious clone

LOCUS cTC-83\_TrD-GFP 17540 bp DNA circular 10-JAN-2022

SOURCE

ORGANISM

FEATURES Location/Qualifiers

|          |                                                                  |  |
|----------|------------------------------------------------------------------|--|
| mutation | 9780..9780                                                       |  |
|          | /vntifkey="62"                                                   |  |
|          | /label=G->C\ (Arg->Tre)\ (TrD)                                   |  |
| mutation | 3..3                                                             |  |
|          | /vntifkey="62"                                                   |  |
|          | /label=A->G\ (TrD)                                               |  |
| CDS      | 13873..14664                                                     |  |
|          | /vntifkey="4"                                                    |  |
|          | /label=Neo                                                       |  |
| CDS      | 10859..12184                                                     |  |
|          | /vntifkey="4"                                                    |  |
|          | /label=E1                                                        |  |
| CDS      | 8420..9244                                                       |  |
|          | /vntifkey="4"                                                    |  |
|          | /label=C                                                         |  |
| 5'UTR    | 1..44                                                            |  |
|          | /vntifkey="52"                                                   |  |
|          | /label=5'UTR                                                     |  |
| CDS      | 45..1649                                                         |  |
|          | /product="nsP1"                                                  |  |
|          | /vntifkey="4"                                                    |  |
|          | /label=nsP1                                                      |  |
|          | /note="putative"                                                 |  |
| CDS      | 1650..4031                                                       |  |
|          | /product="nsP2"                                                  |  |
|          | /function="replication"                                          |  |
|          | /vntifkey="4"                                                    |  |
|          | /label=nsP2                                                      |  |
|          | /note="putative"                                                 |  |
| CDS      | 4032..5702                                                       |  |
|          | /product="nsP3"                                                  |  |
|          | /function="replication"                                          |  |
|          | /vntifkey="4"                                                    |  |
|          | /label=nsP3                                                      |  |
|          | /note="putative"                                                 |  |
| CDS      | 9245..9421                                                       |  |
|          | /product="E3"                                                    |  |
|          | /function="incorporated into the envelope of some alpha viruses" |  |
|          | /vntifkey="4"                                                    |  |
|          | /label=E3                                                        |  |
|          | /note="putative"                                                 |  |
| CDS      | 10691..10858                                                     |  |
|          | /product="6K protein"                                            |  |
|          | /vntifkey="4"                                                    |  |
|          | /label=6k                                                        |  |



```

        /note="putative"
CDS      9422..10690
        /vntifkey="4"
        /label=E2
misc_feature 12823..4
        /vntifkey="21"
        /label=plasmid\vector
misc_RNA   12331..12414
        /vntifkey="53"
        /label=Antigenomic\RBZ\HDV
promoter   16969..17540
        /vntifkey="29"
        /label=CMV\promoter
misc_feature 13493..13795
        /vntifkey="21"
        /label=SV40\ori
polyA_signal 12823..13408
        /vntifkey="25"
        /label=PolyA\signal\from\HGH\human\growth\hormone)
CDS      complement(15934..16794)
        /vntifkey="4"
        /label=Ap
rep_origin 15224..15769
        /vntifkey="33"
        /label=p15A\origin\of\replication
CDS      7581..8297
        /vntifkey="4"
        /label=GFP
CDS      5703..7523
        /vntifkey="4"
        /label=nsP4
promoter   7501..7545
        /vntifkey="29"
        /label=SP1
promoter   8359..8403
        /vntifkey="29"
        /label=SP2
BASE COUNT 4692 a 4447 c 4443 g 3958 t
ORIGIN
      1 atgggcgggcg catgagagaa gcccagacca attacctacc caaaatggag
aaagttcacg
     61 ttgacatcga ggaagacagc ccattcctca gagctttgca gcgagagcttc
ccgcagtttg
    121 aggtagaagc caagcagggtc actgataatg accatgctaa tgccagagcg
ttttcgcatac
    181 tggcttcaaa actgatcgaa acggagggtgg acccatccga cacgatcctt
gacattggaa
    241 gtgcgcccgc ccgcagaatg tattctaagc acaagtatca ttgtatctgt
ccgatgagat
    301 gtgcggaaga tccggacaga ttgtataagt atgcaactaa gctgaagaaa
aactgtaagg
    361 aaataactga taaggaattg gacaagaaaa tgaaggagct cgccgcccgtc
atgagcgacc

```

421 ctgacctgga aactgagact atgtgcctcc acgacgacga gtcgtgtcgc  
 tacgaagggc  
 481 aagtcgctgt ttaccaggat gtatacgcgg ttgacggacc gacaagtctc  
 taccaccaag  
 541 ccaataaggg agttagagtc gcctactgga taggccttga caccaccctt  
 tttatgttta  
 601 agaacttggc tggagcatat ccatcatact ctaccaactg ggccgacgaa  
 accgtgttaa  
 661 cggctcgtaa cataggccta tgcagctctg acgttatgga gcggtcacgt  
 agagggatgt  
 721 ccattcttag aaagaagtat ttgaaacat ccaacaatgt tctattctct  
 gttggctcga  
 781 ccattctacca cgagaagagg gacttactga ggagctggca cctgccgtct  
 gtatttcact  
 841 tacgtggcaa gcaaaattac acatgtcggg gtgagactat agttagttgc  
 gacgggtacg  
 901 tcgttaaaag aatagctatc agtccaggcc tgtatgggaa gccttcaggc  
 tatgctgcta  
 961 cgatgcaccg cgagggattc ttgtgctgca aagtgacaga cacattgaac  
 ggggagaggg  
 1021 tctcttttcc cgtgtgcacg tatgtgccag ctacattgtg tgaccaaagt  
 actggcatac  
 1081 tggcaacaga tgtcagtgcg gacgacgcgc aaaaactgct ggttgggctc  
 aaccagcgta  
 1141 tagtcgtcaa cggtcgcacc cagagaaaca ccaataccat gaaaaattac  
 cttttgcccg  
 1201 tagtggccca ggcatttgct aggtgggcaa aggaatataa ggaagatcaa  
 gaagatgaaa  
 1261 ggccactagg actacgagat agacagttag tcatgggggtg ttgttgggct  
 tttagaaggc  
 1321 acaagataac atctatttat aagcgcccgg atacccaaac catcatcaaa  
 gtgaacagcg  
 1381 atttccactc attcgtgctg cccaggatag gcagtaacac attggagatc  
 gggctgagaa  
 1441 caagaatcag gaaaatgtta gaggagcaca aggagccgtc acctctcatt  
 accgccgagg  
 1501 acgtacaaga agctaagtgc gcagccgatg aggctaagga ggtgctgaa  
 gccgaggagt  
 1561 tgcgcgcagc tctaccacct ttggcagctg atgttgagga gccactctg  
 gaagccgatg  
 1621 tcgacttgat gttacaagag gctggggccg gctcagtgga gacacctcgt  
 ggcttgataa  
 1681 aggttaccag ctacgatggc gaggacaaga tcggctctta cgctgtgctt  
 tctccgcagg  
 1741 ctgtactcaa gagtgaaaaa ttatcttgca tccaccctct cgctgaacaa  
 gtcatagtga  
 1801 taacacactc tggccgaaaa gggcgttatg ccgtggaacc ataccatggt  
 aaagtagtgg  
 1861 tgccagaggg acatgcaata cccgtccagg actttcaagc tctgagtga  
 agtgccacca  
 1921 ttgtgtacaa cgaacgtgag ttcgtaaaca ggtacctgca ccatattgcc  
 acacatggag

1981 gagcgcgtgaa cactgatgaa gaatattaca aaactgtcaa gcccagcgcg  
 cacgacggcg  
 2041 aatacctgta cgacatcgac aggaaacagt gcgtcaagaa agaactagtc  
 actgggctag  
 2101 ggctcacagg cgagctggtg gatcctccct tccatgaatt cgcctacgag  
 agtctgagaa  
 2161 cacgaccagc cgctccttac caagtaccaa ccataggggt gtatggcgtg  
 ccaggatcag  
 2221 gcaagtctgg catcattaaa agcgcagtca ccaaaaaaga tctagtgggtg  
 agcgccaaga  
 2281 aagaaaactg tgcagaaatt ataagggacg tcaagaaaat gaaagggctg  
 gacgtcaatg  
 2341 ccagaactgt ggactcagtg ctcttgaatg gatgcaaaca ccccgtagag  
 accctgtata  
 2401 ttgacgaagc ttttgcttgt catgcaggta ctctcagagc gctcatagcc  
 attataagac  
 2461 ctaaaaaggc agtgctctgc ggggatccca aacagtgcgg tttttttaac  
 atgatgtgcc  
 2521 tgaaagtgca ttttaaccac gagatttgca cacaagtctt ccacaaaagc  
 atctctcgcc  
 2581 gttgcactaa atctgtgact tcggtcgtct caaccttggt ttacgacaaa  
 aaaatgagaa  
 2641 cgacgaatcc gaaagagact aagattgtga ttgacactac cggcagtacc  
 aaacctaacg  
 2701 aggacgatct cattctcact tgtttcagag ggtgggtgaa gcagttgcaa  
 atagattaca  
 2761 aaggcaacga aataatgacg gcagctgcct ctcaagggct gacccgtaaa  
 ggtgtgtatg  
 2821 ccgttcggta caaggtgaat gaaaatcctc tgtacgcacc cacctcagaa  
 catgtgaacg  
 2881 tcctactgac ccgcacggag gaccgcatcg tgtggaaaac actagccggc  
 gacctatgga  
 2941 taaaaacact gactgccaag taccctggga atttactgc cacgatagag  
 gagtggcaag  
 3001 cagagcatga tgccatcatg aggcacatct tggagagacc ggacctacc  
 gacgtcttcc  
 3061 agaataaggc aaacgtgtgt tgggccaagg ctttagtgcc ggtgctgaag  
 accgctggca  
 3121 tagacatgac cactgaacaa tggaacactg tggattatth tgaaacggac  
 aaagctcact  
 3181 cagcagagat agtattgaac caactatgcg tgaggttctt tggactcgat  
 ctggactccg  
 3241 gtctatthtc tgcaccact gttccgttat ccattaggaa taatcactgg  
 gataactccc  
 3301 cgtcgcttaa catgtacggg ctgaataaag aagtggccg tcagctctct  
 cgcaggtacc  
 3361 cacaactgcc tcgggcagtt gccactggaa gagtctatga catgaacact  
 ggtacactgc  
 3421 gcaattatga tccgcgcata aacctagtag ctgtaaacag aagactgcct  
 catgctthtag  
 3481 tcctccacca taatgaacac ccacagagtg actthtcttc attcgtcagc  
 aaattgaagg

3541 gcagaactgt cctggtgggtc ggggaaaagt tgtccgtccc aggcaaaatg  
 gttgactggt  
 3601 tgtcagaccg gcctgagggt accttcagag ctcggttgga tttaggcatc  
 ccagggtgatg  
 3661 tgcccaaata tgacataata tttgttaatg tgaggacccc atataaatac  
 catcactatc  
 3721 agcagtgtga agaccatgcc attaagctta gcatgttgac caagaaagct  
 tgtctgcatc  
 3781 tgaatcccgg cggaacctgt gtcagcatag gttatgggta cgctgacagg  
 gccagcgaaa  
 3841 gcatcattgg tgctatagcg cggcagttca agttttcccg ggtatgcaaa  
 ccgaaatcct  
 3901 cacttgaaga gacggaagtt ctgtttgtat tcattgggta cgatcgcaag  
 gcccgtacgc  
 3961 acaatcctta caagctttca tcaacctga ccaacattta tacagggttc  
 agactccacg  
 4021 aagccggatg tgcaccctca tatcatgtgg tgcgagggga tattgccacg  
 gccaccgaag  
 4081 gagtgattat aaatgctgct aacagcaaag gacaacctgg cggagggggtg  
 tgcggagcgc  
 4141 tgtataagaa attcccggaa agcttcgatt tacagccgat cgaagtagga  
 aaagcgcgac  
 4201 tgggtcaaagg tgcagctaaa catatcattc atgccgtagg accaaacttc  
 aacaaagttt  
 4261 cggaggttga aggtgacaaa cagttggcag aggcttatga gtccatcgct  
 aagattgtca  
 4321 acgataacaa ttacaagtca gtagcgattc cactgttgtc caccggcatc  
 ttttcggga  
 4381 acaaagatcg actaaccxaa tcattgaacc atttgctgac agcttttagac  
 accactgatg  
 4441 cagatgtagc catatactgc agggacaaga aatgggaaat gactctcaag  
 gaagcagtgg  
 4501 ctaggagaga agcagtggag gagatatgca tatccgacga ctcttcagtg  
 acagaacctg  
 4561 atgcagagct ggtgaggggtg catccgaaga gttctttggc tggaaggaag  
 ggctacagca  
 4621 caagcgatgg caaaactttc tcataatttg aagggaccaa gtttcaccag  
 gcggccaagg  
 4681 atatagcaga aattaatgcc atgtggcccg ttgcaacgga ggccaatgag  
 caggtatgca  
 4741 tgtatatcct cggagaaagc atgagcagta ttaggtcgaa atgccccgtc  
 gaagagtcgg  
 4801 aagcctccac accacctagc acgctgcctt gcttgtgcat ccatgccatg  
 actccagaaa  
 4861 gagtacagcg cctaaaagcc tcacgtccag aacaaattac tgtgtgctca  
 tcctttccat  
 4921 tgccgaagta tagaatcact ggtgtgcaga agatccaatg ctcccagcct  
 atattgttct  
 4981 caccgaaagt gcctgcgtat attcatccaa ggaagtatct cgtggaaaca  
 ccaccggtag  
 5041 acgagactcc ggagccatcg gcagagaacc aatccacaga ggggacacct  
 gaacaaccac

5101 cacttataac cgaggatgag accaggacta gaacgcctga gccgatcatc  
 atcgaagagg  
 5161 aagaagagga tagcataagt ttgctgtcag atggcccgac ccaccagggtg  
 ctgcaagtgc  
 5221 aggcagacat tcacggggccg ccctctgtat ctagctcatc ctggtccatt  
 cctcatgcat  
 5281 ccgactttga tgtggacagt ttatccatac ttgacaccct ggagggagct  
 agcgtgacca  
 5341 gcggggcaac gtcagccgag actaactctt acttcgcaaa gagtatggag  
 tttctggcgc  
 5401 gaccggtgcc tgccgctcga acagtattca ggaaccctcc acatcccgtc  
 ccgcgacaaa  
 5461 gaacaccgtc acttgcaccc agcagggcct gctcgagaac cagcctagtt  
 tccaccccgc  
 5521 caggcgtgaa tagggatgat actagagagg agctcgaggc gcttaccocg  
 tcacgcactc  
 5581 ctagcaggtc ggtctcgaga accagcctgg tctccaaccc gccaggcgta  
 aatagggtga  
 5641 ttacaagaga ggagtttgag gcgttcgtag cacaacaaca atgacggttt  
 gatgcgggtg  
 5701 catacatctt ttcctccgac accggtcaag ggcatttaca acaaaaatca  
 gtaaggcaaa  
 5761 cgggtgctatc cgaagtgggtg ttggagagga ccgaattgga gatttcgtat  
 gccccgcgcc  
 5821 tcgaccaaga aaaagaagaa ttactacgca agaaattaca gttaaattccc  
 acacctgcta  
 5881 acagaagcag ataccagtcc aggaagggtgg agaaccatgaa agccataaca  
 gctagacgta  
 5941 ttctgcaagg cctagggcat tatttgaagg cagaaggaaa agtggagtgc  
 taccgaaccc  
 6001 tgcacacctgt tcctttgtat tcacttagtg tgaaccgtgc cttttcaagc  
 cccaagggtc  
 6061 cagtgggaagc ctgtaacgcc atgttgaaag agaactttcc gactgtggct  
 tcttactgta  
 6121 ttattccaga gtacgatgcc tatttggaca tgggtgacgg agcttcatgc  
 tgcttagaca  
 6181 ctgccagttt ttgccctgca aagctgcgca gctttccaaa gaaacactcc  
 tatttgaac  
 6241 ccacaatacg atcggcagtg ccttcagcga tccagaacac gctccagaac  
 gtccctggcag  
 6301 ctgccacaaa aagaaattgc aatgtcacgc aaatgagaga attgcccgtg  
 ttggattcgg  
 6361 cggcctttta tgtggaatgc ttcaagaaat atgcgtgtaa taatgaatat  
 tgggaaacgt  
 6421 ttaaagaaaa ccccatcagg cttactgaag aaaacgtggg aaattacatt  
 accaaattaa  
 6481 aaggacaaaa agctgctgct ctttttgca agacacataa tttgaatatg  
 ttgcaggaca  
 6541 taccaatgga caggtttgta atggacttaa agagagacgt gaaagtgact  
 ccaggaacaa  
 6601 aacatactga agaacggccc aaggtacagg tgatccaggc tgccgatccg  
 ctagcaacag

6661 cgtatctgtg cggaatccac cgagagctgg ttaggagatt aaatgcggtc  
 ctgcttccga  
 6721 acattcatac actgtttgat atgtcggctg aagactttga cgctattata  
 gccgagcact  
 6781 tccagcctgg ggattgtgtt ctggaaactg acatcgcgtc gtttgataaa  
 agtgaggacg  
 6841 acgccatggc tctgaccgcg ttaatgattc tggaagactt aggtgtggac  
 gcagagctgt  
 6901 tgacgctgat tgaggcggct ttcggcgaaa tttcatcaat acatttgccc  
 actaaaacta  
 6961 aattttaatt cggagccatg atgaaatctg gaatgttcct cacactgttt  
 gtgaacacag  
 7021 tcattaacat tgtaatcgca agcagagtgt tgagagaacg gctaaccgga  
 tcaccatgtg  
 7081 cagcattcat tggagatgac aatatcgtga aaggagtcaa atcggacaaa  
 ttaatggcag  
 7141 acaggtgctg cacctggttg aatatggaag tcaagattat agatgctgtg  
 gtgggcgaga  
 7201 aagcgcctta tttctgtgga gggtttattt tgtgtgactc cgtgaccggc  
 acagcgtgcc  
 7261 gtgtggcaga cccctaataa aggctgttta agcttgcaa acctctggca  
 gcagacgatg  
 7321 aacatgatga tgacaggaga agggcattgc atgaagagtc aacacgctgg  
 aaccgagtgg  
 7381 gtattctttc agagctgtgc aaggcagtag aatcaaggta tgaaaccgta  
 ggaacttcca  
 7441 tcatagttat ggccatgact actctagcta gcagtgttaa atcattcagc  
 tacctgagag  
 7501 gggcccctat aactctctac ggctaacctg aatggactac gacatagtct  
 agtccgcaa  
 7561 gtctagagct tgccgccacc atggtgagca agggcgagga gctgttcacc  
 ggggtggtgc  
 7621 ccatacctgg cgagctggac ggcgacgtaa acggccacaa gttcagcgtg  
 tccggcgagg  
 7681 gcgagggcga tgccacctac ggcaagctga ccctgaagtt catctgcacc  
 accggcaagc  
 7741 tgcccgtgcc ctggcccacc ctcgtgacca ccctgacctg cggcgtgcag  
 tgcttcagcc  
 7801 gctaccccga ccacatgaag cagcacgact tcttcaagtc cgccatgccc  
 gaaggctacg  
 7861 tccaggagcg caccatcttc ttcaaggacg acggcaacta caagaccgcg  
 gccgaggtga  
 7921 agttcgaggg cgacaccctg gtgaaccgca tcgagctgaa gggcatcgac  
 ttcaaggagg  
 7981 acggcaacat cctggggcac aagctggagt acaactacaa cagccacaac  
 gtctatatca  
 8041 tggccgacaa gcagaagaac ggcatacagg tgaacttcaa gatccgccac  
 aacatcgagg  
 8101 acggcagcgt gcagctcgcc gaccactacc agcagaacac ccccatcggc  
 gacggccccg  
 8161 tgctgctgcc cgacaaccac tacctgagca ccagtcctgc cctgagcaaa  
 gacccaacg

8221 agaagcgcgga tcacatgggtc ctgctggagt tcgtgaccgc cgccggggtc  
 actctcggca  
 8281 tggacgagct gtacaagtaa agcggcccaa tgatccgacc agcaaaactc  
 gatgtacttc  
 8341 cgaggaactg atgtgcataa gcccctataa ctctctacgg ctaacctgaa  
 tggactacga  
 8401 catagtctag tccgccaaga tgttcccgtt ccagccaatg tatccgatgc  
 agccaatgcc  
 8461 ctatcgcaac ccgttcgcgg ccccgcgag gccctgggtc cccagaaccg  
 acccttttct  
 8521 ggcgatgcag gtgcaggaat taaccgcctc gatggctaac ctgacgttca  
 agcaacgccg  
 8581 ggacgcgcca cctgaggggc catccgctaa gaaaccgaag aaggaggcct  
 cgcaaaaaca  
 8641 gaaaggggga ggccaaggga agaagaagaa gaaccaaggg aagaagaagg  
 ctaagacagg  
 8701 gccgcctaataat ccgaaggcac agaattggaaa caagaagaag accaacaaga  
 aaccaggcaa  
 8761 gagacagcgc atgggtcatga aattggaatc tgacaagacg ttcccaatca  
 tgttggaagg  
 8821 gaagataaac ggctacgctt gtgtgggtcgg aggggaagtta ttcaggccga  
 tgcattgtga  
 8881 aggcaagatc gacaacgacg ttctggccgc gcttaagacg aagaaagcat  
 ccaataacga  
 8941 tcttgagtat gcagatgtgc cacagaacat gcgggccgat acattcaaat  
 acacccatga  
 9001 gaaaccccaa ggctattaca gctggcatca tggagcagtc caatatgaaa  
 atgggctgtt  
 9061 cacggtgccg aaaggagttg gggccaaggg agacagcggg cgacccattc  
 tggataacca  
 9121 gggacgggtg gtcgctattg tgctgggagg tgtgaatgaa ggatctagga  
 cagcccttct  
 9181 agtcgtcatg tggaacgaga agggagttac cgtgaagtat actccggaga  
 actgcgagca  
 9241 atgggtcacta gtgaccacca tgtgtctgct cgccaatgtg acgttcccat  
 gtgctcaacc  
 9301 accaatttgc tacgacagaa aaccagcaga gactttggcc atgctcagcg  
 ttaacgttga  
 9361 caaccggggc tacgatgagc tgctggaagc agctgttaag tgccccggaa  
 ggaaaaggag  
 9421 atccaccgag gagctgttta atgagtataa gctaacgcgc ccttacatgg  
 ccagatgcat  
 9481 cagatgtgca gttgggagct gccatagtcc aatagcaatc gaggcagtaa  
 agagcgacgg  
 9541 gcacgacggg tatgttagac ttcagacttc ctcgcagtat ggccctggatt  
 cctccggcaa  
 9601 cttaaaggggc aggaccatgc ggtatgacat gcacgggacc attaaagaga  
 taccactaca  
 9661 tcaagtgtca ctctatacat ctcgcccgtg tcacattgtg gatgggcacg  
 gttatttcct  
 9721 gcttgccagg tgccccggcag gggactccat caccatggaa ttaagaaag  
 attccgtcac

9781 acactcctgc tcggtgccgt atgaagtga atttaatcct gtaggcagag  
 aactctatac  
 9841 tcatcccca gaacacggag tagagcaagc gtgccaagtc tacgcacatg  
 atgcacagaa  
 9901 cagaggagct tatgtcgaga tgcacctccc gggctcagaa gtggacagca  
 gtttggtttc  
 9961 cttgagcggc agttcagtca ccgtgacacc tcctgatggg actagcgccc  
 tgggtggaatg  
 10021 cgagtgtggc ggcacaaaga tctccgagac catcaacaag acaaaacagt  
 tcagccagtg  
 10081 cacaaagaag gagcagtgc gagcatatcg gctgcagaac gataagtggg  
 tgtataattc  
 10141 tgacaaactg ccaaagcag cgggagccac cttaaaagga aaactgcatg  
 tcccattctt  
 10201 gctggcagac ggcaaagc cgtgcctct agcaccagaa cctatgataa  
 ccttcggttt  
 10261 cagatcagtg tcaactgaaac tgcaccctaa gaatcccaca tatctaatac  
 cccgccaaact  
 10321 tgctgatgag cctcactaca cgcacgagct catatctgaa ccagctgtta  
 ggaattttac  
 10381 cgtcaccgaa aaaggggtgg agtttgtatg gggaaaccac ccgccgaaaa  
 ggttttgggc  
 10441 acaggaaaca gcacccggaa atccacatgg gctaccgcac gaggtgataa  
 ctcatattta  
 10501 ccacagatac cctatgtcca ccatcctggg tttgtcaatt tgtgccgcca  
 ttgcaaccgt  
 10561 ttccgttgca gcgtctacct ggctgttttg cagatctaga gttgcgtgcc  
 taactcctta  
 10621 ccggctaaca cctaacgcta ggataccatt ttgtctggct gtgctttgct  
 gcgcccgcac  
 10681 tgcccggggc gagaccacct gggagtcctt ggatcaccta tggaacaata  
 accaacagat  
 10741 gttctggatt caattgctga tccctctggc cgccttgatc gtagtgactc  
 gcctgctcag  
 10801 gtgcgtgtgc tgtgtcgtgc cttttttagt catggccggc gccgcaggcg  
 ccggcgcccta  
 10861 cgagcacgcg accacgatgc cgagccaagc gggaatctcg tataacacta  
 tagtcaacag  
 10921 agcaggctac gcaccactcc ctatcagcat aacaccaaca aagatcaagc  
 tgatacctac  
 10981 agtgaacttg gagtacgtca cctgccacta caaaacagga atggattcac  
 cagccatcaa  
 11041 atgctgcgga tctcaggaat gcactccaac ttacaggcct gatgaacagt  
 gcaaagtctt  
 11101 cacaggggtt taccggttca tgtgggggtg tgcataattgc ttttgcgaca  
 ctgagaacac  
 11161 ccaagtcagc aaggcctacg taatgaaatc tgacgactgc cttgcggatc  
 atgctgaagc  
 11221 atataaagcg cacacagcct cagtgcaggc gttcctcaac atcacagtgg  
 gagaacactc  
 11281 tattgtgact accgtgtatg tgaatggaga aactcctgtg aatttcaatg  
 gggtaaaat



11341 aactgcaggt ccgctttcca cagcttggac accctttgat cgcaaaatcg  
 tgcagtatgc  
 11401 cggggagatc tataattatg attttcctga gtatggggca ggacaaccag  
 gagcatttgg  
 11461 agatatacaa tccagaacag tctcaagctc tgatctgtat gccaatacca  
 acctagtgc  
 11521 gcagagaccc aaagcaggag cgatccacgt gccatacact caggcacctt  
 cgggttttga  
 11581 gcaatggaag aaagataaag ctccatcatt gaaatttacc gcccctttcg  
 gatgcgaaat  
 11641 atatacaaac cccattcgcg ccgaaaactg tgctgtaggg tcaattccat  
 tagcctttga  
 11701 cattcccgac gccttggttca ccagggtgtc agaaacaccg acactttcag  
 cggccgaatg  
 11761 cactcttaac gagtgcggtg attcttccga ctttggtggg atcgccacgg  
 tcaagtactc  
 11821 ggccagcaag tcaggcaagt gcgcagtcca tgtgccatca gggactgcta  
 ccctaaaaga  
 11881 agcagcagtc gagctaaccg agcaagggtc ggcgactatc catttctcga  
 ccgcaaatat  
 11941 ccacccggag ttcaggctcc aaatatgcac atcatatggt acgtgcaaag  
 gtgattgtca  
 12001 cccccgaaa gaccatattg tgacacaccc tcagtatcac gcccaaacat  
 ttacagccgc  
 12061 ggtgtcaaaa accgcgtgga cgtgggttaac atccctgctg ggaggatcag  
 ccgtaattat  
 12121 tataattggc ttggtgctgg ctactattgt ggccatgtac gtgctgacca  
 accagaaaca  
 12181 taattgaata cagcagcaat tggcaagctg cttacataga actcgcggcg  
 attggcatgc  
 12241 cgccttaaaa tttttatttt atttttcttt tcttttccga atcggttttt  
 gtttttaata  
 12301 tttcaaaaaa aaaaaaaaaa aaaaaaaaaa gggtcggcat ggcattctcca  
 cctcctcgcg  
 12361 gtccgacctg ggcattccga ggaggacgca cgtccactcg gatggctaag  
 ggagagccac  
 12421 gagtcctcg acagatcata atcagccata ccacatttgt agaggtttta  
 cttgctttaa  
 12481 aaaacctccc acacctcccc ctgaacctga aacataaaat gaatgcaatt  
 gttgttggtta  
 12541 acttgtttat tgcagcttat aatggttaca aataaagcaa tagcatcaca  
 aatttcacaa  
 12601 ataaagcatt tttttcactg cattctagtt gtggtttgtc caaactcatc  
 aagatacgcg  
 12661 tacgcggccc catgttcgcc ttccgccgcg tggaggagga tcacagcaac  
 accgagctgg  
 12721 gcatcgtgga gtaccagcac gccttcaaga ccccgatgc agatgccggt  
 gaagaaagag  
 12781 tttaaacggc cggccgcggg catagctggt tcctgaacag atcccgggtg  
 gcatccctgt  
 12841 gaccctccc cagtgcctct cctggccctg gaagttgcca ctccagtgc  
 caccagcctt

12901 gtcctaataa aattaagttg catcattttg tctgactagg tgtccttcta  
taatatattg  
12961 ggggtggaggg ggggtggtatg gagcaagggg caagttggga agacaacctg  
tagggcctgc  
13021 ggggtctatt gggaaccaag ctggagtgca gtggcacaat cttggctcac  
tgcaatctcc  
13081 gcctcctggg ttcaagcgat tctcctgcct cagcctcccg agttgttggg  
attccaggca  
13141 tgcattgacca ggctcagcta atttttgttt ttttggtaga gacgggggttt  
caccatattg  
13201 gccaggctgg tctccaactc ctaatctcag gtgatctacc caccttggcc  
tcccaaattg  
13261 ctgggattac aggcgtgaac cactgctccc ttccctgtcc ttctgatttt  
aaaataacta  
13321 taccagcagg aggacgtcca gacacagcat aggctacctg gccatgcccc  
accggtggga  
13381 catttgagtt gcttgcttgg cactgtcctc tcatgcgttg ggtccactca  
gtagatgcct  
13441 gttgaattgg gtacgcggcc agcttggctg tggaatgtgt gtcagttagg  
gtgtggaaag  
13501 tccccaggct cccagcagg cagaagtatg caaagcatgc atctcaatta  
gtcagcaacc  
13561 aggtgtggaa agtccccagg ctccccagca ggcagaagta tgcaaagcat  
gcatctcaat  
13621 tagtcagcaa ccatagtccc gccctaact ccgcccattc cgcccctaac  
tccgcccagt  
13681 tccgcccatt ctccgccccca tggctgacta atttttttta tttatgcaga  
ggccgaggcc  
13741 gcctcggcct ctgagctatt ccagaagtag tgaggaggct tttttggagg  
cctaggcttt  
13801 tgcaaaaagc tcccgggagc ttgtatatcc attttcggat ctgatcaaga  
gacaggatga  
13861 ggatcgtttc gcatgattga acaagatgga ttgcacgcag gttctccggc  
cgcttgggtg  
13921 gagaggctat tcggctatga ctgggcacaa cagacaatcg gctgctctga  
tgccgcccgtg  
13981 ttccggctgt cagcgcaggg gcgcccgtt ctttttgtca agaccgacct  
gtccggtgcc  
14041 ctgaatgaac tgcaggacga ggcagcgcgg ctatcgtggc tggccacgac  
gggcgttcct  
14101 tgcgcagctg tgctcgacgt tgtcactgaa gcgggaaggg actggctgct  
attgggcgaa  
14161 gtgccggggc aggatctcct gtcattctac cttgctcctg ccgagaaagt  
atccatcatg  
14221 gctgatgcaa tgcggcggct gcatacgctt gatccggcta cctgcccatt  
cgaccaccaa  
14281 gcgaaacatc gcatcgagcg agcacgtact cggatggaag ccggtcttgt  
cgatcaggat  
14341 gatctggacg aagagcatca ggggctcgcg ccagccgaac tgttcgccag  
gctcaaggcg  
14401 cgcattgcccg acggcgagga tctcgtcgtg acccatggcg atgcctgctt  
gccgaatatc

14461 atggtggaaa atggccgctt ttctggattc atcgactgtg gccggctggg  
tgtggccgac  
14521 cgctatcagg acatagcggt ggctaccggt gatattgctg aagagcttgg  
cggcgaatgg  
14581 gctgaccgct tcctcgtgct ttacgggtat gccgctcccg attcgcagcg  
catcgccttc  
14641 tatcgccttc ttgacgaggt cttctgagcg ggactctggg gttcgaaatg  
accgaccaag  
14701 cgacgcccaa cctgccatca cgagatttcg attccaccgc cgccttctat  
gaaagggttg  
14761 gcttcggaat cgttttccgg gacgccggct ggatgatcct ccagcgcggg  
gatctcatgc  
14821 tggagttctt cgcccacccc aacttgttta ttgcagctta taatggttac  
aaataaagca  
14881 atagcatcac aaatttcaca aataaagcat ttttttcaact gcattctagt  
tgtgggttgt  
14941 ccaaactcat caatgtatct tatcatgtct gtatactggc ttactatggt  
ggcactgatg  
15001 aggggtgtcag tgaagtgctt catgtggcag gagaaaaaag gctgcaccgg  
tgcgtcagca  
15061 gaatatgtga tacaggatat attccgcttc ctcgctcact gactcgctac  
gctcggtcgt  
15121 tcgactgcgg cgagcggaaa tggcttacga acggggcgga gatttcctgg  
aagatgccag  
15181 gaagatactt aacagggaag tgagagggcc gcggcaaagc cgtttttcca  
taggctccgc  
15241 cccctgaca agcatcacga aatctgacgc tcaaatcagt ggtggcgaaa  
cccgacagga  
15301 ctataaagat accaggcggt tcccctggcg gctccctcgt gcgctctcct  
gttctgcct  
15361 ttcggtttac cgggtgtcatt ccgctgttat ggccgcgttt gtctcattcc  
acgcctgaca  
15421 ctcagttccg ggtaggcagt tcgctccaag ctggactgta tgcacgaacc  
ccccgttcag  
15481 tccgaccgct gcgccttata cggtaactat cgtcttgagt ccaaccggga  
aagacatgca  
15541 aaagcaccac tggcagcagc cactggtaat tgatttagag gagttagtct  
tgaagtcag  
15601 cgccgggttaa ggctaaactg aaaggacaag ttttggtgac tgcgctcctc  
caagccagtt  
15661 acctcggttc aaagagttgg tagctcagag aaccttcgaa aaaccgccct  
gcaaggcggg  
15721 tttttcgttt tcagagcaag agattacgcg cagacaaaaa cgatctcaag  
aagatcatct  
15781 tattaagggg tctgacgctc agtggaacga aaactcacgt taagggattt  
tggtcatgag  
15841 attatcaaaa aggatcttca cctagatcct tttaaattaa aatgaagtt  
ttaaatcaat  
15901 ctaaagtata tatgagtaaa cttgggtctga cagttaccaa tgcttaatca  
gtgaggcacc  
15961 tatctcagcg atctgtctat ttcgttcata catagttgcc tgactccccg  
tcgtgtagat

16021 aactacgata cgggagggct taccatctgg cccagtgct gcaatgatac  
cgcgagaccc  
16081 acgctcaccg gctccagatt tatcagcaat aaaccagcca gccggaaggg  
ccgagcgcag  
16141 aagtggtcct gcaactttat ccgcctccat ccagtctatt aattggtgcc  
gggaagctag  
16201 agtaagtagt tcgccagtta atagtttgcg caacgttggt gccattgctg  
caggcatcgt  
16261 ggtgtcacgc tcgtcgtttg gtatggcttc attcagctcc ggttcccaac  
gatcaaggcg  
16321 agttacatga tcccccatgt tgtgcaaaaa agcgggttagc tccttcggtc  
ctccgatcgt  
16381 tgtcagaagt aagttggccg cagtgttata actcatgggt atggcagcac  
tgcataattc  
16441 tcttactgtc atgccatccg taagatgctt ttctgtgact ggtgagtact  
caaccaagtc  
16501 attctgagaa tagtgtatgc ggcgaccgag ttgctcttgc ccggcgtaaa  
cacgggataa  
16561 taccgcgcca catagcagaa ctttaaaagt gctcatcatt ggaaaacgtt  
cttcggggcg  
16621 aaaactctca aggatcttac cgctgttgag atccagttcg atgtaacca  
ctcgtgcacc  
16681 caactgatct tcagcatctt ttactttcac cagcgtttct gggtgagcaa  
aaacaggaag  
16741 gcaaaatgcc gcaaaaaagg gaataagggc gacacggaaa tggtgaatac  
tcatactctt  
16801 cttttttcaa tattattgaa gcatttatca gggttattgt ctcatgagcg  
gatacatatt  
16861 tgaatgtatt tagaaaaata aacaaatagg ggttccgcgc acatttcccc  
gaaaagtgcc  
16921 acctgacgtg tcgacgcggc cgcacattga ttattgacta gttattaata  
gtaatcaatt  
16981 acgggggtcat tagttcatag cccatatatg gagttccgcg ttacataact  
tacggtaaat  
17041 ggcccgctg gctgaccgcc caacgacccc cgcccattga cgtcaataat  
gacgtatggt  
17101 cccatagtaa cgccaatagg gactttccat tgacgtcaat ggggtggagta  
tttacggtaa  
17161 actgcccact tggcagtaca tcaagtgtat catatgccaa gtccgcccc  
tattgacgtc  
17221 aatgacggta aatggcccg ctaggcattat gccagtaga tgaccttacg  
ggactttcct  
17281 acttggcagt acatctacgt attagtcata gctattacca tgggtgatgcg  
gttttggcag  
17341 tacaccaatg ggcgtggata gcggtttgac tcacggggat ttccaagtct  
ccacccatt  
17401 gacgtcaatg ggagtttggt ttggcaccaa aatcaacggg actttccaaa  
atgtcgtaat  
17461 aaccccgccc cgttgacgca aatgggcggg aggcgtgtac ggtgggaggt  
ctatataagc  
17521 agagctcggt tagtgaaccg

//

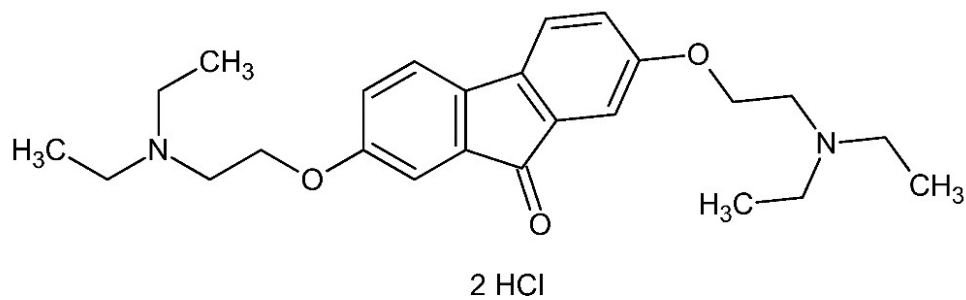

2,7-bis[2-(diethylamino)ethoxy]fluoren-9-one hydrochloride

Tilorone

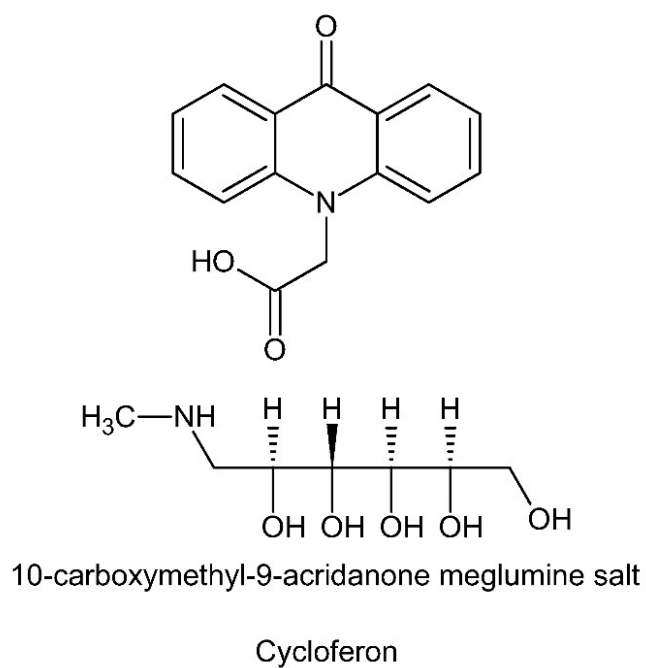

**Figure S8.** Chemical structures of Tilorone and Cridanimod.

**Table S1.** Data for calculation of LD50 for the TC-83/TrD virus <sup>1</sup>

| Virus dilution     | Mice in group | Numbers dead (+) or alive (-) |    | Cumulative sums |    | Cumulative percent of dead |
|--------------------|---------------|-------------------------------|----|-----------------|----|----------------------------|
|                    |               | +                             | -  | +               | -  |                            |
| 1:10               | 10            | 10                            | 0  | 48              | 0  | 100                        |
| 1:10 <sup>2</sup>  | 10            | 10                            | 0  | 38              | 0  | 100                        |
| 1:10 <sup>3</sup>  | 10            | 8                             | 2  | 28              | 2  | 93                         |
| 1:10 <sup>4</sup>  | 10            | 8                             | 2  | 20              | 4  | 83                         |
| 1:10 <sup>5</sup>  | 10            | 8                             | 2  | 12              | 6  | 67                         |
| 1:10 <sup>6</sup>  | 10            | 4                             | 6  | 4               | 12 | 25                         |
| 1:10 <sup>7</sup>  | 10            | 0                             | 10 | 0               | 22 | 0                          |
| 1:10 <sup>8</sup>  | 10            | 0                             | 10 | 0               | 32 | 0                          |
| 1:10 <sup>9</sup>  | 10            | 0                             | 10 | 0               | 42 | 0                          |
| 1:10 <sup>10</sup> | 10            | 0                             | 10 | 0               | 52 | 0                          |

<sup>1</sup> Comments: Adult mice were infected with the TC-83/TrD virus using subcutaneous route and inoculum volume 100 ul. The titer in LD50 units is  $2.5 \times 10^6$ . The same sample titer in PFU is  $2.5 \times 10^7$  PFU/ml, translating into 1 LD50 = 10 PFU.
